# Supplementary material for: Glioblastoma-infiltrated innate immune cells resemble M0 macrophage phenotype
Source: JCI journal article supplement (doi:10.1172/jci.insight.85841), 2016-02-24
Supplement: sd1 [file 1]

## **SUPPLEMENTAL MATERIAL AND METHOD**

### ***Peripheral blood analysis***

Blood samples were analyzed by the Pathology Core Laboratory at the University of Texas MD Anderson Cancer Center. Routine hematology fluorescence flow cytometry of whole blood samples were carried out using an XN-10 automated analyzer (Sysmex Corporation). Data on healthy individuals ( $n = 57$ ), glioblastoma patients ( $n = 60$ ), grade III brain tumor patients ( $n = 30$  [anaplastic astrocytoma,  $n = 17$ ; anaplastic oligodendroglioma,  $n = 13$ ]), low-grade (I + II) brain tumor patients ( $n = 33$  [grade I juvenile pilocytic astrocytoma,  $n = 17$ ; grade II diffuse glioma,  $n = 3$ ; grade II oligodendroglioma,  $n = 13$ ]) was collected.

### ***Glioblastoma tissue microarray***

Glioblastoma-specific tissue microarrays (TMAs) were constructed under protocol number PA12-0136 and contained 137 glioblastoma samples described previously (1). For TMA construction, two 1-mm cores per tumor sample were obtained from different areas of the tumors. The rationale for using TMAs was to facilitate analysis of the largest number of tumor samples possible. The study neuropathologist (G.N. Fuller) gathered the tissue sections from archived paraffin-embedded blocks and confirmed the pathologic tumor type. The time from resection to fixation was less than 20 minutes in all cases, in accordance with the Clinical Laboratory Improvement Amendments standard.

### ***Glioblastoma volumetric analysis***

#### ***Image analysis and software***

A total of 85 patient images were available for analysis. The 3D-Slicer software (version 4.3.1; [www.slicer.org](http://www.slicer.org)), an open-source image analytics platform, was used for all image processing and segmentation (2-4). The segmented images were reviewed by two experienced neuroradiologists (R.R. Collen and A. Elakkad).

### *Image registration*

The contrast-enhanced T1-weighted imaging (T1WI) and Fluid-Attenuated Inversion Recovery (FLAIR) sequences were used in the study. Prior to segmentation, each FLAIR image was registered to the contrast-enhanced T1WI, and they were rigidly aligned with each other. Resampling was performed, when differences in voxel size between the FLAIR and post-contrast T1WI were observed. Adequate registration was designated as an error of 2-mm or less.

### *Image segmentation and volume extraction*

The contrast-enhanced T1WI was used for segmentation of the enhancing portion (defined as active tumor) and non-enhancing central T1-hypointense portion (defined as necrosis) of the tumor. The perilesional non-enhancing FLAIR hyperintense portion of the tumor, defined as the edema/invasion component, was segmented using the FLAIR sequence. Hyperintensity on pre-contrast T1WI was used to assess for hemorrhage. Images were segmented from the peripheral (edema/invasion) to central (necrosis). Three main distinct imaging phenotypes were segmented, and the edema/invasion, tumor and necrosis volumes were obtained.

### *Immunofluorescence study*

Staining with an anti-Iba1 antibody was used to detect the microglia/macrophages in the glioblastoma TMA samples. Five-micrometer paraffin-embedded TMA sections were deparaffinized and subjected to graded rehydration prior to staining. Standard antigen retrieval (10 mM citrate buffer, pH 6.0) and blocking with 10% serum were performed, followed by incubation with an anti-Iba1 antibody (diluted 1:1000; Wako Pure Chemical Industries, Ltd.) overnight at 4°C. Afterward, slides were incubated with an Alexa Fluor 555-conjugated antibody (diluted 1:1000; Invitrogen). Fluorescently-labeled slides were stained with 4',6-diamidino-2-phenylindole (Sigma) and mounted with a fluorescence mounting medium (Dako). Imaging was performed using the Vectra Automated Multispectral Imaging System with a Vectra 2 microscope (Perkin Elmer). Iba1-positive cells were quantified using the InForm 2.1 software (Perkin Elmer) and manually by an independent scientist.

### ***Antibodies***

Human immune cells were stained with the following antibodies and matched IgG controls: CD11b-PE, CD33-APC, CD45-APC-H7, CD86-PerCP-Cy5.5, CD163-Brilliant Violet 421, and HLA-DR-DP-DQ-FITC (BD Biosciences); CD206-APC and CD14-PE-Vio770 (Miltenyi Biotec); CD15-PerCP-Cy5.5, CD33-Brilliant Violet 570, CD33-PerCP-Cy5.5, CD80-PE-Cy7, and colony-stimulating factor 1 receptor (CSF-1R)/CD115-APC (Biolegend); and CD204-PE (R&D Systems). For intracellular staining, IL10-APC, pSTAT1-Alexa Fluor 488, and pSTAT3-PerCP-Cy5.5 (BD Biosciences) and TGF- $\beta$ 1 (LAP)-PE-Cy7 and TNF- $\alpha$ -Brilliant Violet 421 (Biolegend) were used.

### ***Surface marker and intracellular cytokine staining***

The most commonly used criterion to distinguish CNS microglia from macrophages is differential CD45 expression (CD45<sup>low</sup> for microglia and CD45<sup>high</sup> for macrophages) in CD11b<sup>+</sup>/CD11c<sup>+</sup> cells (5-7). Human MDSCs express the cell surface markers CD11b, CD45, and CD33 (8). CD11b<sup>+</sup> cells were incubated with fluorescence-labeled primary antibodies or matched isotype IgG controls for 15 minutes at 4°C. For intracellular cytokine analysis, CD11b<sup>+</sup> cells were fixed with Fix/Perm (BD Biosciences), washed in PermWash (Transcription Factor Buffer Set; BD Biosciences) according to manufacturer's protocol, and stained with fluorescence-labeled monoclonal antibodies or isotype controls for 50 minutes at 4° C. Before acquisition, cells were re-suspended in a 0.1% paraformaldehyde solution (Santa Cruz Biotechnology) in PBS. Approximately 1x10<sup>5</sup> live gated events based on forward scatter and side scatter were assessed using a Gallios 561 Flow Cytometer (Beckman Coulter), and analyzed using the FlowJo software (Tree Star Inc.).

### ***RNA isolation and comparative analysis***

After extraction using a mirVana kit (Ambion), RNA samples from glioblastoma-infiltrating CD14<sup>+</sup> cells ( $n = 4$ ) with matched CD14<sup>+</sup> blood cells and CD14<sup>+</sup> blood cells from healthy donors ( $n = 4$ ) were checked for purity and quality using an Agilent Bioanalyzer before being submitted to Human Whole Genome OneArray Version 5.1 (30,275 human genes) analysis provided by the Phalanx Biotech Group (Belmont). This microarray data were submitted to the Gene Expression Omnibus database (National Cancer for Biotechnology Information) under accession number GSE77043.

### ***Identification of glioblastoma subtypes***

#### ***RNA isolation and sequencing***

For RNA-sequencing, total RNA from 27 glioblastoma samples was isolated using a Masterpure Complete DNA and RNA Purification Kit (Epicentre) after proteinase K digestion according to the manufacturer's instructions. Paired-end sequencing of the RNA was performed using an Illumina HiSeq3000 at the MD Anderson Sequencing and Microarray Core Facility. An average of 55 million paired-ends was generated for each sample (range 43-71 million). Each end was 75 bp in size. Short transcript reads were mapped to human protein-coding genes in an Ensembl reference transcriptome (version 64), and reads per kilobase per million reads and values were generated using Pipeline for RNA-sequencing Data Analysis (9). The Cancer Genome Atlas glioblastoma transcriptional subtypes (Proneural, Neural, Classical and Mesenchymal) (10, 11) were assigned to the 27 samples using single-sample gene set enrichment analysis (GSEA) (12) and previously defined subtype signature genes (10, 11). The accession number is GSE77530.

#### ***nCounter miRGE assay***

Using a mirVana miRNA isolation kit (Life Technologies) according to the manufacturer's protocol, total RNA from healthy-donor CD14<sup>+</sup> blood cells ( $n = 11$ ) and glioblastoma-patient CD14<sup>+</sup> blood cells ( $n = 11$ ) were extracted and used in a Nanostring analysis, and glioblastoma-infiltrating



CD14<sup>+</sup> cells ( $n = 11$ ) with matched CD14<sup>+</sup> blood cells ( $n = 11$ ) were extracted and used for a second Nanostring analysis. RNA concentration was measured using a Nanodrop 2000c spectrophotometer (Thermo Scientific). RNA (200 ng) at a concentration of 40 ng/μl in a total volume of 5 μl was prepared for an nCounter miRGE assay. Our custom-made CodeSet detects 99 mRNAs (Table 1), 24 miRNAs, and 5 long noncoding RNAs (lncRNAs) (Table 2). The nCounter miRGE assay is a highly sensitive, multiplexed assay designed to detect both mRNAs and miRNAs in a single tube from total RNA. Sample preparation and hybridization were performed for the miRGE assay according to the manufacturer's instructions (NanoString Technologies, Inc.). Briefly, RNA samples were prepared by ligating a specific DNA tag (miR-tag) onto the 3' end of each mature miRNA according to the manufacturer's instructions, and excess tags were removed via restriction digestion at 37°C. After processing using an miRNA sample preparation kit, the entire 10-μl reaction volume containing mRNA and tagged miRNAs was hybridized with a 10-μl reporter CodeSet, 10 μl of hybridization buffer, and a 5-μl capture ProbeSet (for a total reaction volume of 35 μl) at 65°C for 16-20 hours. Excess probes were removed using two-step magnetic bead-based purification with an nCounter Prep Station. The specific target molecules were quantified using an nCounter Digital Analyzer by counting the individual fluorescent barcodes and assessing target molecules. The data were collected using the nCounter Digital Analyzer after obtaining images of the immobilized fluorescent reporters in the sample cartridge using a charge-coupled device camera.

### ***Analysis of Nanostring and microarray data***

#### ***Nanostring***

Nanostring data were analyzed using the NanoStringNorm R package (version 1.1.17). The following normalization parameters were used: 1) CodeCount (positive controls): geometric mean; 2) Background (negative controls): mean plus two standard deviations; and 3) SampleContent (RNA content): top geometric mean (top 75% expressed). Given the technical differences in sample preparation, miRNA expression data were analyzed independently of mRNA and lncRNA expression data (13). Differential expression between groups was assessed using a two-sample, two-sided *t*-test. Multiple

testing corrections were performed using the Benjamini-Hochberg method. The maximum false discovery rate threshold level ( $q$ -value) was 0.05.

#### *Microarray*

Normalized RNA expression matrices were obtained from Phalanx Biotech Group. Differential expression analysis was performed using the limma R package (version 3.22.7).

#### *Functional enrichment analysis*

Pathways and ontologies enriched in global expression were investigated by two complementary strategies. 1) Pre-ranked GSEA was performed using limma differential expression gene expression  $t$ -test statistics. 2) Ingenuity pathway analysis (IPA; summer 2015 release; QIAGEN) was performed using the threshold  $\log_2$  expression ratio (absolute)  $> 1$  and  $q$ -value  $< 0.01$ .

#### *Data visualization and unsupervised analyses*

Both microarray expression array and Nanostring data were visualized using the ggplot2 graphing package in heat maps of  $\log_2$  expression values scaled for each gene across samples. Plots of enriched gene sets or pathways were also generated with ggplot2. Hierarchical clustering of the data was performed in the R language using Ward's method with the square root of the Jensen-Shannon divergence as the distance metric. Plots illustrating differentially expressed genes detected by Nanostring or microarray reflect the statistical thresholds described above. Hierarchical clustering and principal coordinate analysis of Nanostring expression profiles in Figure 7 considered all genes with a mean  $\log_2$  expression value  $> 1$ .

## References

1. Heimberger AB, Abou-Ghazal M, Reina-Ortiz C, Yang DS, Sun W, Qiao W, et al. Incidence and prognostic impact of FoxP3<sup>+</sup> regulatory T cells in human gliomas. *Clin Cancer Res.* 2008;14:5166-72.
2. Archip N, Jolesz FA, Warfield SK. A validation framework for brain tumor segmentation. *Academic radiology.* 2007;14:1242-51.
3. Gering DT, Nabavi A, Kikinis R, Hata N, O'Donnell LJ, Grimson WE, et al. An integrated visualization system for surgical planning and guidance using image fusion and an open MR. *J Magn Reson Imaging.* 2001;13:967-75.
4. Pichon E, Tannenbaum A, Kikinis R. A statistically based flow for image segmentation. *Medical image analysis.* 2004;8:267-74.
5. Hussain SF, Yang D, Suki D, Grimm E, Heimberger AB. Innate immune functions of microglia isolated from human glioma patients. *J Transl Med.* 2006;4:15, PMCID: PMC1501057.
6. Sedgwick JD, Schwender S, Imrich H, Dorries R, Butcher GW, ter Meulen V. Isolation and direct characterization of resident microglial cells from the normal and inflamed central nervous system. *Proc Natl Acad Sci U S A.* 1991;88:7438-42.
7. Wu A, Wei J, Kong LY, Wang Y, Priebe W, Qiao W, et al. Glioma cancer stem cells induce immunosuppressive macrophages/microglia. *Neuro Oncol.* 2010;12:1113-25.
8. Ochando JC, Chen SH. Myeloid-derived suppressor cells in transplantation and cancer. *Immunol Res.* 2012;54:275-85.
9. Torres-Garcia W, Zheng S, Sivachenko A, Vegesna R, Wang Q, Yao R, et al. PRADA: pipeline for RNA sequencing data analysis. *Bioinformatics.* 2014;30:2224-6.
10. Verhaak RG, Hoadley KA, Purdom E, Wang V, Qi Y, Wilkerson MD, et al. Integrated genomic analysis identifies clinically relevant subtypes of glioblastoma characterized by abnormalities in PDGFRA, IDH1, EGFR, and NF1. *Cancer Cell.* 2010;17:98-110.

11. Brennan CW, Verhaak RG, McKenna A, Campos B, Noushmehr H, Salama SR, et al. The somatic genomic landscape of glioblastoma. *Cell*. 2013;155:462-77.
12. Barbie DA, Tamayo P, Boehm JS, Kim SY, Moody SE, Dunn IF, et al. Systematic RNA interference reveals that oncogenic KRAS-driven cancers require TBK1. *Nature*. 2009;462:108-12.
13. Waggott D, Chu K, Yin S, Wouters BG, Liu FF, Boutros PC. NanoStringNorm: an extensible R package for the pre-processing of NanoString mRNA and miRNA data. *Bioinformatics*. 2012;28:1546-8.

Supplemental Figure 1

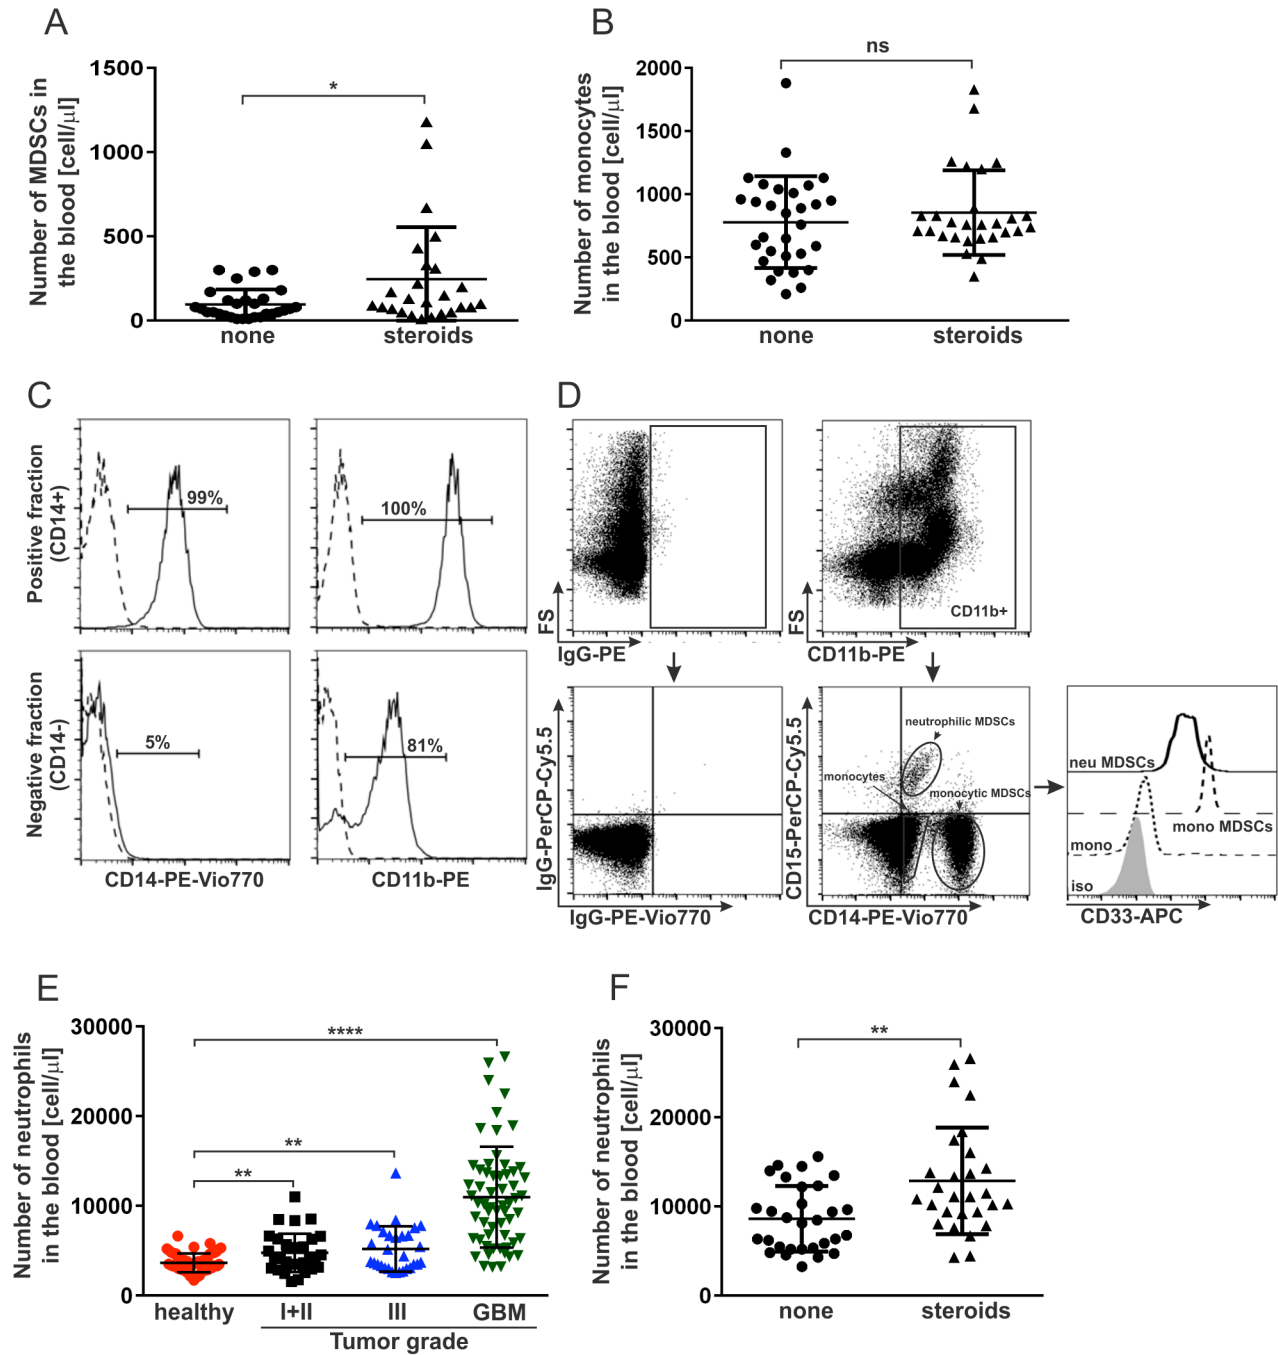

**Supplemental Figure 1.** (A) Numbers of MDSCs in the blood of glioblastoma patients not given ( $n = 29$ ) or given the steroid dexamethasone ( $n = 25$ ) before tumor resection. The data are presented as the mean  $\pm$  SD. An unpaired  $t$ -test with Welch's correction was used to calculate  $P$  values.  $*P < 0.05$ . (B) Numbers

of monocytes in the blood of glioblastoma patients not given ( $n = 30$ ) or given the steroid dexamethasone ( $n = 28$ ) before tumor resection. The data are presented as the mean  $\pm$  SD. An unpaired  $t$ -test with Welch's correction was used to calculate  $P$  values. ns, not significant. **(C)** Representative histograms for CD14-positively (top) and -negatively (bottom) selected cell fractions from glioblastoma-patient blood cells stained with anti-CD14 (left) and CD11b (right) antibodies. **(D)** Gating strategy for glioblastoma-patient peripheral blood mononuclear cells is shown. CD11b<sup>+</sup> cells were gated based on dot plots for FS/IgG (top left) and FS/CD11b (top right). Monocytes (CD11b<sup>+</sup>/CD14<sup>+</sup>), monocytic MDSCs (CD11b<sup>+</sup>/CD14<sup>high</sup>/CD15<sup>-</sup>), and neutrophilic MDSCs (CD11b<sup>+</sup>/CD14<sup>low</sup>/CD15<sup>+</sup>) were distinguished based on dot plots for IgG/IgG (bottom left) and CD15/CD14 (bottom middle). A representative histogram overlay for CD33 expression in monocytes, monocytic MDSCs, and neutrophilic MDSCs relative to isotype control (gray histogram) is shown. **(E)** Numbers of neutrophils in blood obtained from healthy donors (red circles,  $n = 57$ ), low-grade (I + II) brain tumor patients (black squares,  $n = 33$ ), grade III brain tumor patients (blue triangles,  $n = 30$ ), and glioblastoma (GBM) patients (green triangles,  $n = 60$ ). The data are presented as the mean  $\pm$  SD. An unpaired  $t$ -test with Welch's correction was used to calculate  $P$  values.  $**P < 0.01$ ;  $****P < 0.0001$ . **(F)** Numbers of neutrophils in the blood of glioblastoma patients not given ( $n = 30$ ) or given the steroid dexamethasone ( $n = 28$ ) before tumor resection. The data are presented as the mean  $\pm$  SD. An unpaired  $t$ -test with Welch's correction was used to calculate  $P$  values.  $**P < 0.01$ .

Supplemental Figure 2

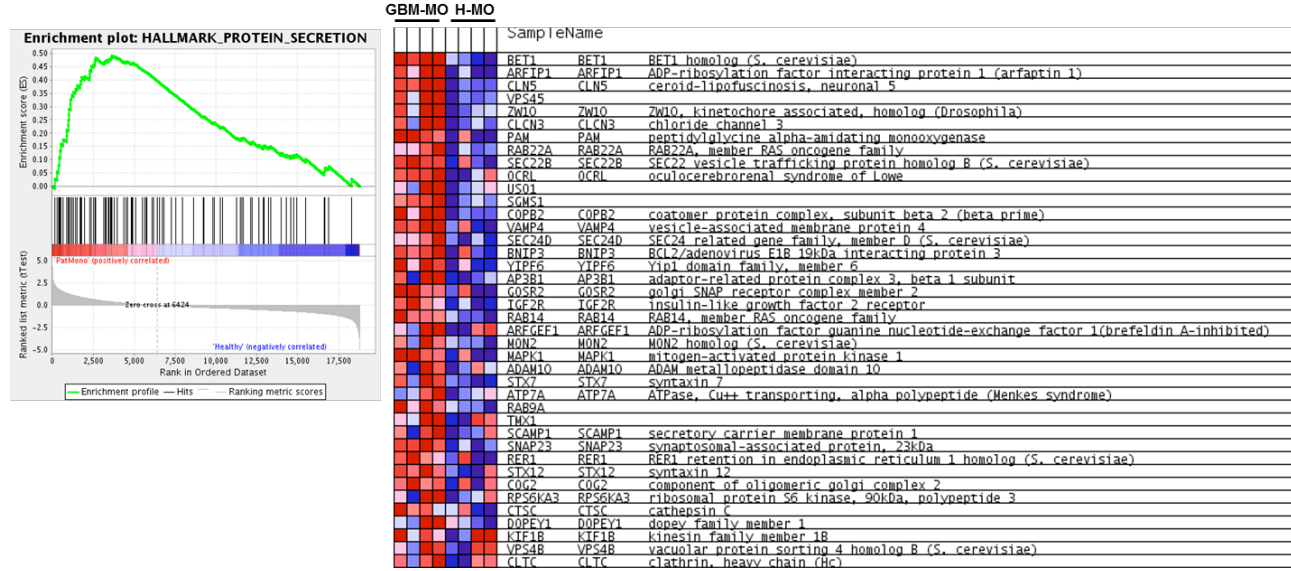

**Supplemental Figure 2.** GSEA enrichment plots and expression heat maps for glioblastoma-patient CD14<sup>+</sup> blood cells (GBM-MO,  $n = 4$ ) and healthy-donor CD14<sup>+</sup> blood cells (H-MO,  $n = 4$ ).

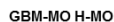

|  |  | SampleName        |                                                                                          |
|--|--|-------------------|------------------------------------------------------------------------------------------|
|  |  | ATP6V1C1 ATP6V1C1 | ATPase, H+ transporting, lysosomal 42kDa, V1 subunit C1                                  |
|  |  | IOH1 IOH1         | isocitrate dehydrogenase 1 (NADP+), soluble                                              |
|  |  | ETFDH ETFDH       | electron-transferring-flavoprotein dehydrogenase                                         |
|  |  | SUC1A2 SUC1A2     | succinate-CoA ligase, ADP-forming, beta subunit                                          |
|  |  | ATP6V1D ATP6V1D   | ATPase, H+ transporting, lysosomal 34kDa, V1 subunit D                                   |
|  |  | COX5A COX5A       | cytochrome c oxidase subunit Va                                                          |
|  |  | MTX2 MTX2         | metaxin 2                                                                                |
|  |  | PDH8 PDH8         | pyruvate dehydrogenase (lipoamide) beta                                                  |
|  |  | CYC5 CYC5         | cytochrome c, somatic                                                                    |
|  |  | ACADM ACDM        | acyl-coenzyme A dehydrogenase, C-4 to C-12 straight chain                                |
|  |  | PDHX PDHX         | pyruvate dehydrogenase complex, component X                                              |
|  |  | COX15 COX15       | COX15 homolog, cytochrome c oxidase assembly protein (yeast)                             |
|  |  | ATFH1             |                                                                                          |
|  |  | TOM70A TOM70A     | translocase of outer mitochondrial membrane 70 homolog A (S. cerevisiae)                 |
|  |  | FH FH             | fumarate hydratase                                                                       |
|  |  | NDH1 NDH1         | malate dehydrogenase 1, NAD (soluble)                                                    |
|  |  | COX11 COX11       | Cox11 homolog, cytochrome c oxidase assembly protein (yeast)                             |
|  |  | PDK4 PDK4         | pyruvate dehydrogenase kinase, sorcy 4                                                   |
|  |  | NDUFA8 NDUFA8     | NADH dehydrogenase (ubiquinone) 1 alpha subcomplex, 8, 19kDa                             |
|  |  | MTRF1 MTRF1       | mitochondrial translational release factor 1                                             |
|  |  | PRDX3 PRDX3       | peroxiredoxin 3                                                                          |
|  |  | SLC25A20 SLC25A20 | solute carrier family 25 (carnitine/acylcarnitine translocase), member 20                |
|  |  | ACAT1 ACAT1       | acyl-coenzyme A acetyltransferase 1 (acetoacetyl Coenzyme A thiolase)                    |
|  |  | HTRA2 HTRA2       | HTRA serine peptidase 2                                                                  |
|  |  | VOAC3 VOAC3       | voltage-dependent anion channel 3                                                        |
|  |  | OGDH OGDH         | oxoglutarate (alpha-ketoglutarate) dehydrogenase (lipoamide)                             |
|  |  | NDUFB6 NDUFB6     | NADH dehydrogenase (ubiquinone) 1 beta subcomplex, 6, 17kDa                              |
|  |  | NDUFB3 NDUFB3     | NADH dehydrogenase (ubiquinone) 1 beta subcomplex, 3, 12kDa                              |
|  |  | SDHC SDHC         | succinate dehydrogenase complex, subunit C, integral membrane protein, 15kDa             |
|  |  | NMT NMT           | nicotinamide nucleotide transhydrogenase                                                 |
|  |  | ETFA ETFA         | electron-transfer-flavoprotein, alpha polypeptide (glutaric aciduria II)                 |
|  |  | IMMT IMMT         | inner membrane protein, mitochondrial (mitofilin)                                        |
|  |  | CV85A CV85A       | cytochrome b5 type A (microsomal)                                                        |
|  |  | DC1R1 DC1R1       | 2,4-dienoyl CoA reductase 1, mitochondrial                                               |
|  |  | LRPPRC LRPPRC     | leucine-rich PPR-motif containing                                                        |
|  |  | UCRFS1 UCRFS1     | ubiquinol-cytochrome c reductase, Rieske iron-sulfur polypeptide 1                       |
|  |  | RHO1T RHO1T       | ras homolog gene family, member T1                                                       |
|  |  | TM1010 TM1010     | translocase of inner mitochondrial membrane 10 homolog (yeast)                           |
|  |  | PDHA1 PDHA1       | pyruvate dehydrogenase (lipoamide) alpha 1                                               |
|  |  | MRP115 MRP115     | mitochondrial ribosomal protein L15                                                      |
|  |  | MRP135 MRP135     | mitochondrial ribosomal protein L35                                                      |
|  |  | TM10B8 TM10B8     | translocase of inner mitochondrial membrane 8 homolog B (yeast)                          |
|  |  | TM10A7A TM10A7A   | translocase of inner mitochondrial membrane 17 homolog A (yeast)                         |
|  |  | ACO2 ACO2         | aconitase 2, mitochondrial                                                               |
|  |  | SLC25A11 SLC25A11 | solute carrier family 25 (mitochondrial carrier; oxoglutarate carrier), member 11        |
|  |  | ATP6V1E1 ATP6V1E1 | ATPase, H+ transporting, lysosomal 31kDa, V1 subunit E1                                  |
|  |  | OPF1 OPF1         | optic atrophy 1 (autosomal dominant)                                                     |
|  |  | SUC1G1 SUC1G1     | succinate-CoA ligase, GDP-forming, alpha subunit                                         |
|  |  | POLR2F POLR2F     | polymerase (RNA) II (DNA directed) polypeptide F                                         |
|  |  | FXN FXN           | frataxin                                                                                 |
|  |  | AF3L2 AF3L2       | AF3 ATPase family gene 3-like 2 (yeast)                                                  |
|  |  | MRP511 MRP511     | mitochondrial ribosomal protein S11                                                      |
|  |  | UCRC2 UCRC2       | ubiquinol-cytochrome c reductase core protein II                                         |
|  |  | RETSAT RETSAT     | retinol saturase (all-trans-retinol 13,14-reductase)                                     |
|  |  | NDUFA1 NDUFA1     | NADH dehydrogenase (ubiquinone) 1, alpha/beta subcomplex, 1, 8kDa                        |
|  |  | NDUFA2 NDUFA2     | NADH dehydrogenase (ubiquinone) Fe-S protein 2, 49kDa (NADH-coenzyme Q reductase)        |
|  |  | MRP512 MRP512     | mitochondrial ribosomal protein S12                                                      |
|  |  | ACAD5B ACAD5B     | acyl-coenzyme A dehydrogenase, short/branched chain                                      |
|  |  | NDUFC1 NDUFC1     | NADH dehydrogenase (ubiquinone) 1, subcomplex unknown, 1, 6kDa                           |
|  |  | LDBH LDBH         | lactate dehydrogenase B                                                                  |
|  |  | NDUFA2 NDUFA2     | NADH dehydrogenase (ubiquinone) 1 alpha subcomplex, 2, 8kDa                              |
|  |  | MTRR MTRR         | 5-methyltetrahydrofolate homocysteine methyltransferase reductase                        |
|  |  | COX10 COX10       | Cox10 homolog, cytochrome c oxidase assembly protein, heme A-Tarnesyltransferase (yeast) |
|  |  | NDUFA5 NDUFA5     | NADH dehydrogenase (ubiquinone) Fe-S protein 4, 18kDa (NADH-coenzyme Q reductase)        |
|  |  | ATP5B ATP5B       | ATP synthase, H+ transporting, mitochondrial F0 complex, subunit b                       |



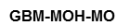

|  |  | SampleName |                                                                                      |
|--|--|------------|--------------------------------------------------------------------------------------|
|  |  | G3BP1      |                                                                                      |
|  |  | MYC        | MYC v-myc myelocytomatosis viral oncogene homolog (avian)                            |
|  |  | PCNA       | PCNA proliferating cell nuclear antigen                                              |
|  |  | ORC2       |                                                                                      |
|  |  | SRF1       |                                                                                      |
|  |  | ARCE1      | ARCE1 ATP-binding cassette, sub-family F (OABP), member 1                            |
|  |  | COXA5      | COXA5 cytochrome c oxidase subunit Va                                                |
|  |  | NOLC1      | NOLC1 nucleolar and coiled-body phosphoprotein 1                                     |
|  |  | NOP16      |                                                                                      |
|  |  | NUP56      |                                                                                      |
|  |  | NCBP2      | NCBP2 nuclear cap binding protein subunit 2, 20kDa                                   |
|  |  | XP01       | XP01 exportin 1 (CRM1 homolog, yeast)                                                |
|  |  | EIF251     | EIF251 eukaryotic translation initiation factor 2, subunit 1 alpha, 35kDa            |
|  |  | EPBS       | EPBS glutamyl-prolyl-tRNA synthetase                                                 |
|  |  | URE2L3     | URE2L3 ubiquitin-conjugating enzyme E2L 3                                            |
|  |  | TMEM70A    | TMEM70A translocase of outer mitochondrial membrane 70 homolog A (S. cerevisiae)     |
|  |  | VBPI       | VBPI von Hippel-Lindau binding protein 1                                             |
|  |  | CSTF2      | CSTF2 cleavage stimulation factor, 3' pre-RNA, subunit 2, 64kDa                      |
|  |  | DDX18      | DDX18 DEAD (Asp-Glu-Ala-Asp) box polypeptide 18                                      |
|  |  | CTC2       | CTC2 chaperonin containing TCP1, subunit 2, (beta)                                   |
|  |  | CLN3       | CLN3 quinine nucleotide binding protein-like 3 (nucleolar)                           |
|  |  | CAD        | CAD carbamoyl-phosphate synthetase 2, aspartate transcarbamylase, and dihydroorotase |
|  |  | PRDX3      | PRDX3 peroxiredoxin 3                                                                |
|  |  | USP1       | USP1 ubiquitin specific peptidase 1                                                  |
|  |  | SF3B3      | SF3B3 splicing factor 3b, subunit 3, 130kDa                                          |
|  |  | CTCS       | CTCS chaperonin containing TCP1, subunit 5 (epsilon)                                 |
|  |  | EIF252     | EIF252 eukaryotic translation initiation factor 2, subunit 2 beta, 38kDa             |
|  |  | RPL6       | RPL6 ribosomal protein L6                                                            |
|  |  | RRP9       |                                                                                      |
|  |  | COF55      | COF55 constitutive photomorphogenic homolog subunit 5 (Arabidopsis)                  |
|  |  | VDAC3      | VDAC3 voltage-dependent anion channel 3                                              |
|  |  | PHB        | PHB prohibitin                                                                       |
|  |  | SERPBP1    | SERPBP1 SERPINE1 mRNA binding protein 1                                              |
|  |  | SNRPD1     | SNRPD1 small nuclear ribonucleoprotein D1 polypeptide 16kDa                          |
|  |  | CTPS       | CTPS CTP synthase                                                                    |
|  |  | REFC4      | REFC4 replication factor C (activator 1) 4, 37kDa                                    |
|  |  | PSM01      | PSM01 proteasome (prosome, macropain) 26S subunit, non-ATPase, 1                     |
|  |  | HSPD1      | HSPD1 heat shock 60kDa protein 1 (chaperonin)                                        |
|  |  | DUT        | DUT dUTP pyrophosphatase                                                             |
|  |  | HSP61      | HSP61 heat shock 10kDa protein 1 (chaperonin 10)                                     |
|  |  | BUB3       | BUB3 budding uninhibited by benzimidazoles 3 homolog (yeast)                         |
|  |  | GL01       | GL01 glyoxalase 1                                                                    |
|  |  | CNA2       | CNA2 cyclin A2                                                                       |
|  |  | C10BP      | C10BP complement component 1, g subcomponent binding protein                         |
|  |  | EEF1B2     | EEF1B2 eukaryotic translation elongation factor 1 beta 2                             |
|  |  | PWF1       | PWF1 homolog (S. cerevisiae)                                                         |
|  |  | PSM014     | PSM014 proteasome (prosome, macropain) 26S subunit, non-ATPase, 14                   |
|  |  | EIF1AX     | EIF1AX eukaryotic translation initiation factor 1A, X-linked                         |
|  |  | WAD2L1     | WAD2L1 WAD2 mitotic arrest deficient-like 1 (yeast)                                  |
|  |  | PSMG6      | PSMG6 proteasome (prosome, macropain) 26S subunit, ATPase, 6                         |
|  |  | SNRPD3     | SNRPD3 small nuclear ribonucleoprotein D3 polypeptide 18kDa                          |
|  |  | AIH2P      |                                                                                      |
|  |  | NME1       | NME1 non-metastatic cells 1, protein (NM23A) expressed in                            |
|  |  | GSPT1      | GSPT1 G1 to S phase transition 1                                                     |
|  |  | DDX21      | DDX21 DEAD (Asp-Glu-Ala-Asp) box polypeptide 21                                      |
|  |  | HDAC2      | HDAC2 histone deacetylase 2                                                          |
|  |  | SRPK1      | SRPK1 SFRS protein kinase 1                                                          |
|  |  | HNENPA3    |                                                                                      |
|  |  | RRM1       | RRM1 ribonucleotide reductase M1 polypeptide                                         |
|  |  | PSMA4      | PSMA4 proteasome (prosome, macropain) subunit, alpha type, 4                         |
|  |  | E1F3B      |                                                                                      |
|  |  | PSM07      | PSM07 proteasome (prosome, macropain) 26S subunit, non-ATPase, 7 (Moy34 homolog)     |
|  |  | HNENPA2B1  |                                                                                      |
|  |  | RAN        | RAN RAN, member RAS oncogene family                                                  |
|  |  | KPN2A      | KPN2A karyopherin alpha 2 (RAG cohort 1, importin alpha 1)                           |
|  |  | XPOT       | XPOT exportin, RNA (nuclear export receptor for RNAs)                                |
|  |  | S8         | S8 Sjogren syndrome antigen 8 (autoantigen Ia)                                       |
|  |  | HPRT1      | HPRT1 hypoxanthine phosphoribosyltransferase 1 (Lesch-Myhan syndrome)                |
|  |  | CLNS1A     | CLNS1A chloride channel, nucleotide-sensitive, 1A                                    |
|  |  | HDHC2      | HDHC2 HD domain containing 2                                                         |
|  |  | CBX3       | CBX3 chromobox homolog 3 (HP1 gamma homolog, Drosophila)                             |
|  |  | PSMB7      | PSMB7 proteasome (prosome, macropain) subunit, beta type, 7                          |

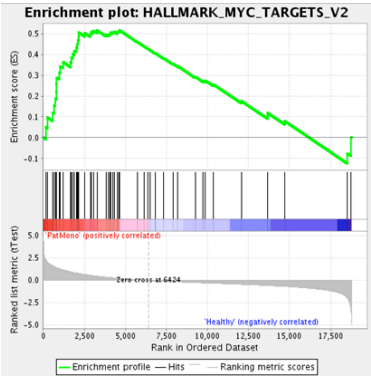

**GBM-MO H-MO**

|  |           | SampleName                                                                 |
|--|-----------|----------------------------------------------------------------------------|
|  | MYC       | v-myc myelocytomatosis viral oncogene homolog (avian)                      |
|  | PRMT3     | protein arginine methyltransferase 3                                       |
|  | NOL1      | nucleolar and coiled-body phosphoprotein 1                                 |
|  | NOP56     |                                                                            |
|  | NOP56     |                                                                            |
|  | MPHOSPH10 | MPHOSPH10 M-phase phosphoprotein 10 (U3 small nucleolar ribonucleoprotein) |
|  | NDUFA4    |                                                                            |
|  | FARSA     |                                                                            |
|  | BYS1      | bystin-like                                                                |
|  | DDX18     | DEAD (Asp-Glu-Ala-Asp) box polypeptide 18                                  |
|  | GNL3      | guanine nucleotide binding protein-like 3 (nucleolar)                      |
|  | PPAN      | peter pan homolog (Drosophila)                                             |
|  | EXOSC5    | exosome component 5                                                        |
|  | RRP9      |                                                                            |
|  | PHB       | prohibitin                                                                 |
|  | HSPD1     | heat shock 60kDa protein 1 (chaperonin)                                    |
|  | HSPA1     | heat shock 10kDa protein 1 (chaperonin 10)                                 |
|  | WAP3K6    | mitogen-activated protein kinase kinase kinase 6                           |
|  | UNG       | uracil-DNA glycosylase                                                     |
|  | RABEPK    | Rab9 effector protein with kelch motifs                                    |
|  | TFB2M     | transcription factor B2, mitochondrial                                     |
|  | AIWP2     |                                                                            |
|  | WDR43     | WD repeat domain 43                                                        |
|  | GRWD1     | glutamate-rich WD repeat containing 1                                      |
|  | TBRG4     | transforming growth factor beta regulator 4                                |

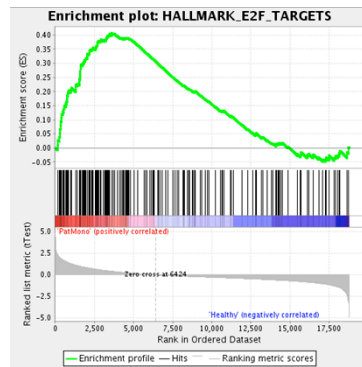

GBM-MO H-MO

| SampleName |          |                                                                                                       |  |
|------------|----------|-------------------------------------------------------------------------------------------------------|--|
| MYC        | MYC      | Y-myc myelocytomatosis viral oncogene homolog (avian)                                                 |  |
| ASF1A      | ASF1A    | ASF1 anti-silencing function 1 homolog A (S. cerevisiae)                                              |  |
| SHMT1      | SHMT1    | serine hydroxymethyltransferase 1 (soluble)                                                           |  |
| PCNA       | PCNA     | proliferating cell nuclear antigen                                                                    |  |
| ORC3       | ORC3     |                                                                                                       |  |
| GIN53      | GIN53    | GIN5 complex subunit 3 (Psf3 homolog)                                                                 |  |
| DCLRE1B    | DCLRE1B  | DNA cross-link repair 18 (F502 homolog, S. cerevisiae)                                                |  |
| DKC        | DKC      | deoxycytidine kinase                                                                                  |  |
| SRSF1      | SRSF1    |                                                                                                       |  |
| ZW10       | ZW10     | ZW10, kinetochore associated, homolog (Drosophila)                                                    |  |
| MCB3       | MCB3     | MCB3 minichromosome maintenance deficient 3 (S. cerevisiae)                                           |  |
| NOLC1      | NOLC1    | nucleolar and coiled-body phosphoprotein 1                                                            |  |
| NUP205     | NUP205   | nucleoporin 205kDa                                                                                    |  |
| NUP55      | NUP55    |                                                                                                       |  |
| BRC1A      | BRC1A    | breast cancer 1, early onset                                                                          |  |
| XP01       | XP01     | exportin 1 (CRM1 homolog, yeast)                                                                      |  |
| EIF251     | EIF251   | eukaryotic translation initiation factor 2, subunit 1 alpha, 35kDa                                    |  |
| LYAR       | LYAR     |                                                                                                       |  |
| RACGAP1    | RACGAP1  | Rac GTPase activating protein 1                                                                       |  |
| PDL03      | PDL03    | polymerase (DNA-directed), delta 3, accessory subunit                                                 |  |
| PPP1R8     | PPP1R8   | protein phosphatase 1, regulatory (inhibitor) subunit 8                                               |  |
| USP1       | USP1     | ubiquitin specific peptidase 1                                                                        |  |
| STAG1      | STAG1    | stromal antigen 1                                                                                     |  |
| HW02       | HW02     | high-mobility group box 2                                                                             |  |
| NCAPD2     | NCAPD2   | non-SMC condensin I complex, subunit D2                                                               |  |
| NASP       | NASP     | nuclear autoantigenic sperm protein (histone-binding)                                                 |  |
| CSE1L      | CSE1L    | CSE1 chromosome segregation 1-like (yeast)                                                            |  |
| MTFHD2     | MTFHD2   | methylene-tetrahydrofolate dehydrogenase (NADP+ dependent) 2, methenyltetrahydrofolate cyclohydrolase |  |
| LUC13      | LUC13    |                                                                                                       |  |
| PBYNC      | PBYNC    | protein kinase, RNA-activated, catalytic polypeptide                                                  |  |
| HUS1       | HUS1     | HUS1 checkpoint homolog (S. pombe)                                                                    |  |
| MSH2       | MSH2     | mutS homolog 2, colon cancer, nonpolyposis type 1 (E. coli)                                           |  |
| RAO51C     | RAO51C   | RAO51 homolog C (S. cerevisiae)                                                                       |  |
| PAIC5      | PAIC5    | phosphoribosylaminimidazole carboxylase, phosphoribosylaminimidazole succinocarboxamide synthetase    |  |
| RNA5EH2A   | RNA5EH2A | ribonuclease H2, subunit A                                                                            |  |
| RPA1       | RPA1     | replication protein A1, 70kDa                                                                         |  |
| NUP107     | NUP107   | nucleoporin 107kDa                                                                                    |  |
| TP53       | TP53     | tumor protein p53 (Li-Fraumeni syndrome)                                                              |  |
| CKS2       | CKS2     | CKS2 protein kinase regulatory subunit 2                                                              |  |
| CTPS       | CTPS     | CTP synthase                                                                                          |  |
| LMBN1      | LMBN1    | lamin B1                                                                                              |  |
| DUT        | DUT      | dUTP pyrophosphatase                                                                                  |  |
| PAN2       | PAN2     |                                                                                                       |  |
| UNG        | UNG      | uracil-DNA glycosylase                                                                                |  |
| RPA2       | RPA2     | replication protein A2, 32kDa                                                                         |  |
| RDCD1      | RDCD1    | RDC1 required for cell differentiation1 homolog (S. pombe)                                            |  |
| CHK2       | CHK2     | CHK2 checkpoint homolog (S. pombe)                                                                    |  |
| RFC3       | RFC3     | replication factor C (activator 1) 3, 38kDa                                                           |  |
| AURKA      | AURKA    | aurora kinase A                                                                                       |  |
| RAO50      | RAO50    | RAO50 homolog (S. cerevisiae)                                                                         |  |
| NBN        | NBN      | nibrin                                                                                                |  |
| UBE2T      | UBE2T    | ubiquitin-conjugating enzyme E2T (putative)                                                           |  |
| MRE11A     | MRE11A   | MRE11 meiotic recombination 11 homolog A (S. cerevisiae)                                              |  |
| SMC1A      | SMC1A    | structural maintenance of chromosomes 1A                                                              |  |
| MLH1       | MLH1     | mutL homolog 1, colon cancer, nonpolyposis type 2 (E. coli)                                           |  |
| REC2       | REC2     | replication factor C (activator 1) 2, 40kDa                                                           |  |
| PSTP1      | PSTP1    | Pc4 and SPB1 interacting protein 1                                                                    |  |
| MAD2L1     | MAD2L1   | MAD2 mitotic arrest deficient-like 1 (yeast)                                                          |  |
| AK2        | AK2      | adenylate kinase 2                                                                                    |  |
| WWE1       | WWE1     | non-metastatic cells 1, protein (NM23A) expressed in                                                  |  |
| CTCF       | CTCF     | CTCF-binding factor (zinc finger protein)                                                             |  |
| GSP11      | GSP11    | G1 to S phase transition 1                                                                            |  |
| PPH10      | PPH10    | protein phosphatase 10 magnesium-dependent, delta isoform                                             |  |
| BIRC5      | BIRC5    | baculoviral IAP repeat-containing 5 (survivin)                                                        |  |
| ING3       | ING3     | inhibitor of growth family, member 3                                                                  |  |
| SMC6       | SMC6     | structural maintenance of chromosomes 6                                                               |  |
| DNMT1      | DNMT1    | DNA (cytosine-5-)-methyltransferase 1                                                                 |  |
| EXOSC8     | EXOSC8   | exosome component 8                                                                                   |  |
| TBRG4      | TBRG4    | transforming growth factor beta regulator 4                                                           |  |
| EEO        | EEO      | embryonic ectoderm development                                                                        |  |
| RAN        | RAN      | RAN, member RAS oncogene family                                                                       |  |
| TACC3      | TACC3    | transforming, acidic coiled-coil containing protein 3                                                 |  |
| EZH2       | EZH2     | enhancer of zeste homolog 2 (Drosophila)                                                              |  |
| UBE25      | UBE25    | ubiquitin-conjugating enzyme E25                                                                      |  |
| KPNA2      | KPNA2    | karyopherin alpha 2 (RAN cohort 1, importin alpha 1)                                                  |  |
| CDKN2A     | CDKN2A   | cyclin-dependent kinase inhibitor 2A (melanoma, p16, inhibits CDK4)                                   |  |
| SMC4       | SMC4     | structural maintenance of chromosomes 4                                                               |  |
| TUBG1      | TUBG1    | tubulin, gamma 1                                                                                      |  |

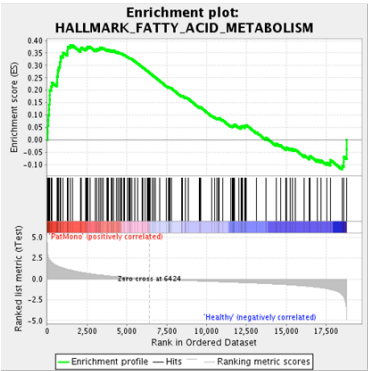

GBM-MO H-MO

|  |         | SampleName                                                                             |
|--|---------|----------------------------------------------------------------------------------------|
|  | MAOA    | MAOA monoamine oxidase A                                                               |
|  | VNH1    | VNH1 vanin 1                                                                           |
|  | IDH1    | IDH1 isocitrate dehydrogenase 1 (NADP+), soluble                                       |
|  | EHHA0H  | EHHA0H enoyl-Coenzyme A hydratase/3-hydroxyacyl Coenzyme A dehydrogenase               |
|  | HSD17B7 | HSD17B7 hydroxysteroid (17-beta) dehydrogenase 7                                       |
|  | CPDX    | CPDX coproporphyrinogen oxidase                                                        |
|  | ETFDH   | ETFDH electron-transferring-flavoprotein dehydrogenase                                 |
|  | HT6CH   | HT6CH 3-hydroxyisobutyryl-Coenzyme A hydrolase                                         |
|  | HSD17B4 | HSD17B4 hydroxysteroid (17-beta) dehydrogenase 4                                       |
|  | SUCLA2  | SUCLA2 succinate-CoA ligase, ADP-forming, beta subunit                                 |
|  | HMGL    | HMGL 3-hydroxymethyl-3-methylglutaryl-Coenzyme A lyase (hydroxymethylglutaricaciduria) |
|  | MLYCD   | MLYCD malonyl-CoA decarboxylase                                                        |
|  | ACOX1   | ACOX1 acyl-Coenzyme A oxidase 1, palmitoyl                                             |
|  | CRY2    | CRY2 crystallin, zeta (quinone reductase)                                              |
|  | PDHB    | PDHB pyruvate dehydrogenase (lipoamide) beta                                           |
|  | HPGD    | HPGD hydroxyprostaglandin dehydrogenase 15-(NAD)                                       |
|  | ACADN   | ACADN acyl-Coenzyme A dehydrogenase, C-4 to C-12 straight chain                        |
|  | AUH     | AUH AU RNA binding protein/enoyl-Coenzyme A hydratase                                  |
|  | UCDH    | UCDH UDP-glucose dehydrogenase                                                         |
|  | ALDH3A2 | ALDH3A2 aldehyde dehydrogenase 3 family, member A2                                     |
|  | MCEE    | MCEE methylmalonyl CoA epimerase                                                       |
|  | FH      | FH fumarate hydratase                                                                  |
|  | MDH1    | MDH1 malate dehydrogenase 1, NAD (soluble)                                             |
|  | CBR1    | CBR1 carbonyl reductase 1                                                              |
|  | DHCR24  | DHCR24 24-dehydrocholesterol reductase                                                 |
|  | ACSL5   | ACSL5 acyl-CoA synthetase long-chain family member 5                                   |
|  | ALDH1A1 | ALDH1A1 aldehyde dehydrogenase 1 family, member A1                                     |
|  | HSD12   | HSD12 hydroxysteroid dehydrogenase like 2                                              |
|  | PPARA   | PPARA peroxisome proliferative activated receptor, alpha                               |

Supplemental Figure 3

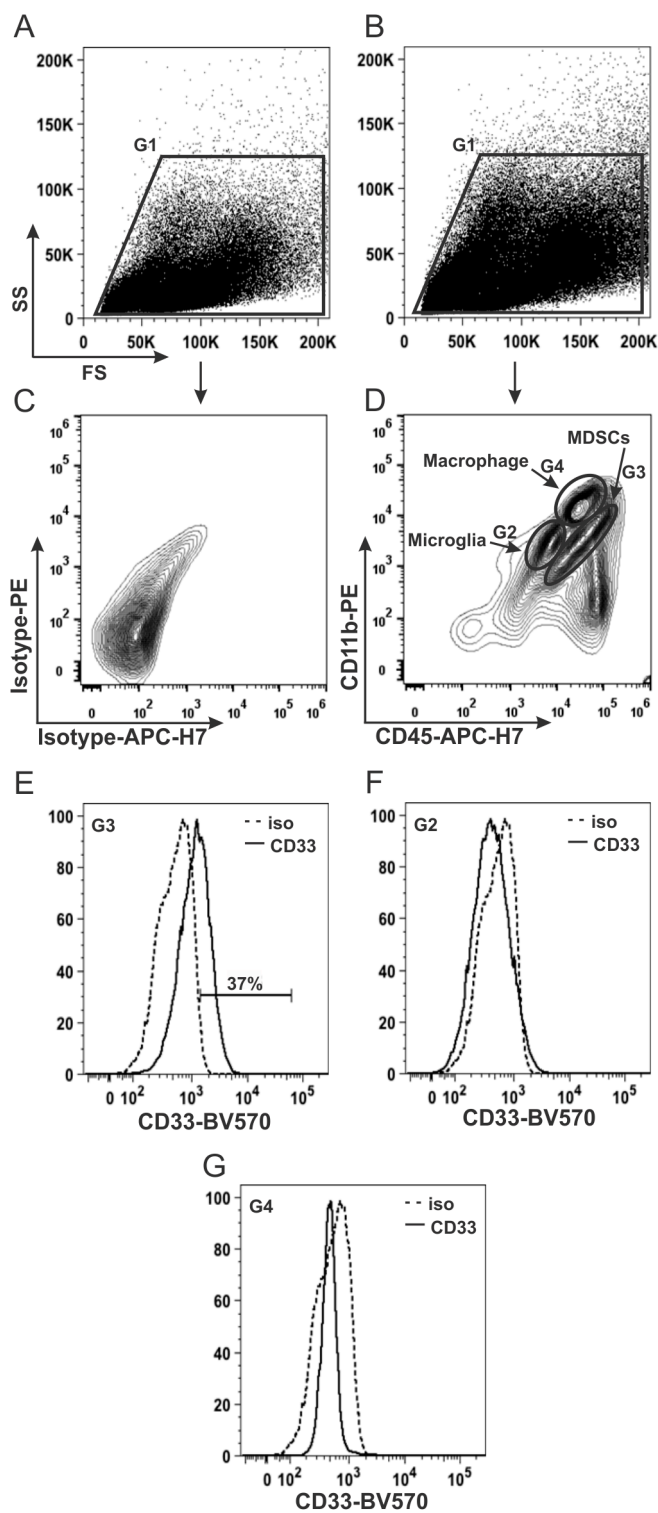

**Supplemental Figure 3.** Gating strategy for analysis of immune cells isolated from glioblastomas. Brain tumor samples were enzymatically digested, and the myelin was separated by Percoll gradient centrifugation. CD11b<sup>+</sup> cells were separated using a magnetic-bead-conjugated anti-CD11b antibody and stained with IgG-PE, IgG-APC, IgG-BV570 (isotype controls) or CD11b-PE, CD45-APC-H7, and CD33-BV570 (stained) to identify myeloid cells. Glioblastoma-infiltrated immune cells were analyzed using side-scatter versus forward-scatter dot plots for both the isotype **(A)** and stained cells **(B)**. **(C)** and **(D)** analysis of 1 x 10<sup>5</sup> cells of CD11b<sup>+</sup> cells from the G1 gate. G2, G3, G4 gates were drawn to indicate microglia (CD11b<sup>+</sup>/CD45<sup>low</sup>), MDSCs (CD11b<sup>+</sup>/CD45<sup>med</sup>) and macrophage (CD11b<sup>+</sup>/CD45<sup>high</sup>) populations, respectively. Additional histograms for CD33 expression in MDSCs **(E)**, microglia **(F)**, and macrophages **(G)** are shown.

## Supplemental Figure 4

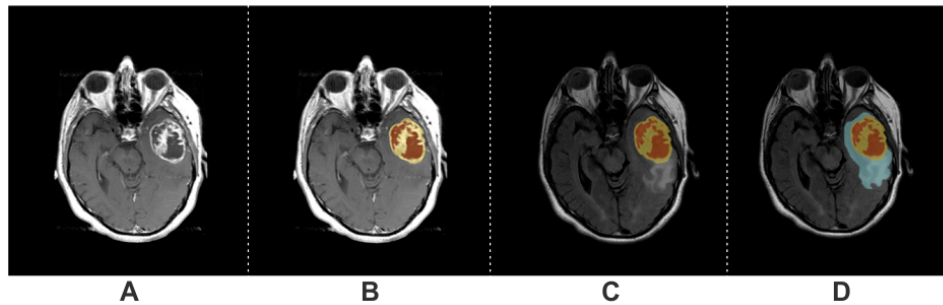

**Supplemental Figure 4.** Representative volumetric analysis of left temporal glioblastoma in a 63-year-old man. **(A)** T1 postcontrast image. **(B)** Image of segmented tumor label overlaid on the postcontrast image. Of note is the segmented enhancement/tumor in yellow and necrosis in red. **(C)** Image of the segmented tumor label overlaid on a FLAIR image registered on the T1 postcontrast image as the baseline. **(D)** Segmented label depicting edema/invasion (blue), tumor (yellow) and necrosis (red).

## Supplemental Figure 5

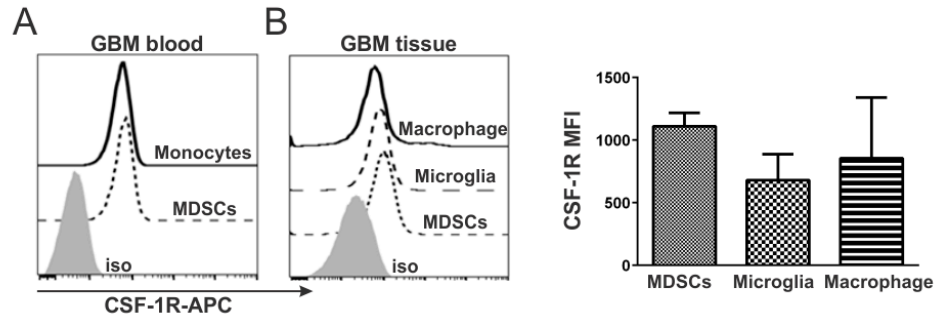

**Supplemental Figure 5.** Expression of CSF-1R in a glioblastoma myeloid-lineage compartment. **(A)** Representative histogram overlay for CSF-1R expression in monocytes and MDSCs from glioblastoma-patient blood sample compared to isotype control (gray histogram). **(B)** Representative histogram overlay for CSF-1R expression in MDSCs, microglia, and macrophages isolated from resected glioblastoma tissue relative to isotype control (gray histogram). MFI of CSF-1R expression in MDSCs, microglia, and macrophages isolated from four glioblastomas. The data are presented as the mean  $\pm$  SD.



Supplemental Figure 6

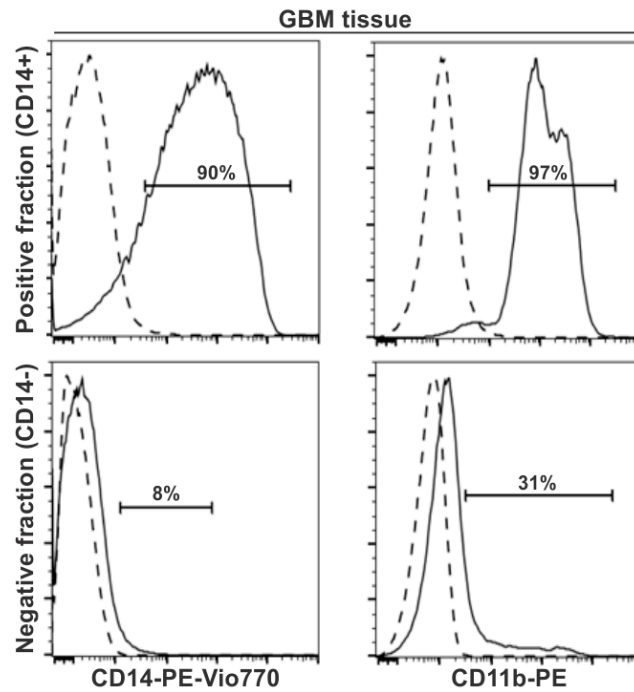

**Supplemental Figure 6.** Representative histograms for CD14-positively (top) and -negatively (bottom) selected cell fractions from resected glioblastoma (GBM) tissue stained with anti-CD14 (left) and -CD11b (right) antibodies.

Supplemental Figure 7

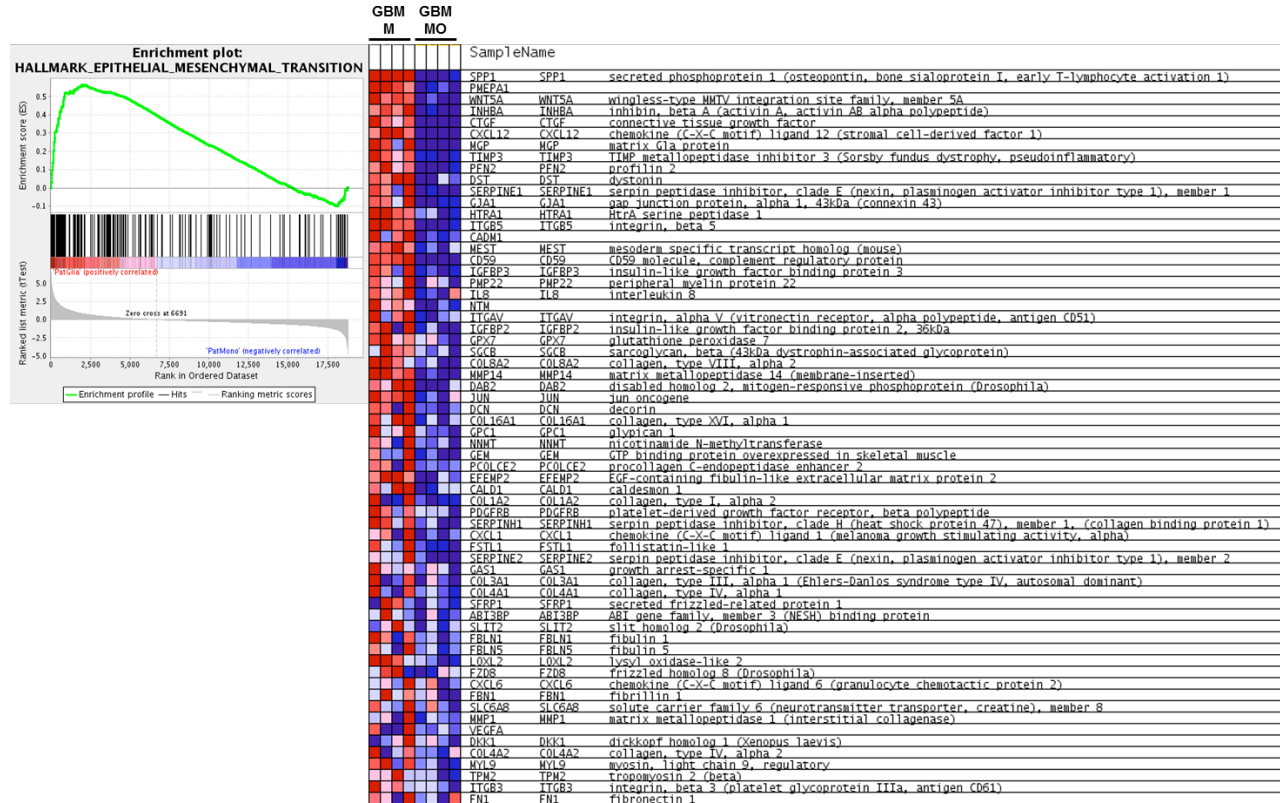

Supplemental Figure 7. GSEA enrichment plots and expression heat maps for glioblastoma-infiltrating CD14<sup>+</sup> cells (GBM-M,  $n = 4$ ) and matched CD14<sup>+</sup> blood cells (GBM-MO,  $n = 4$ ).

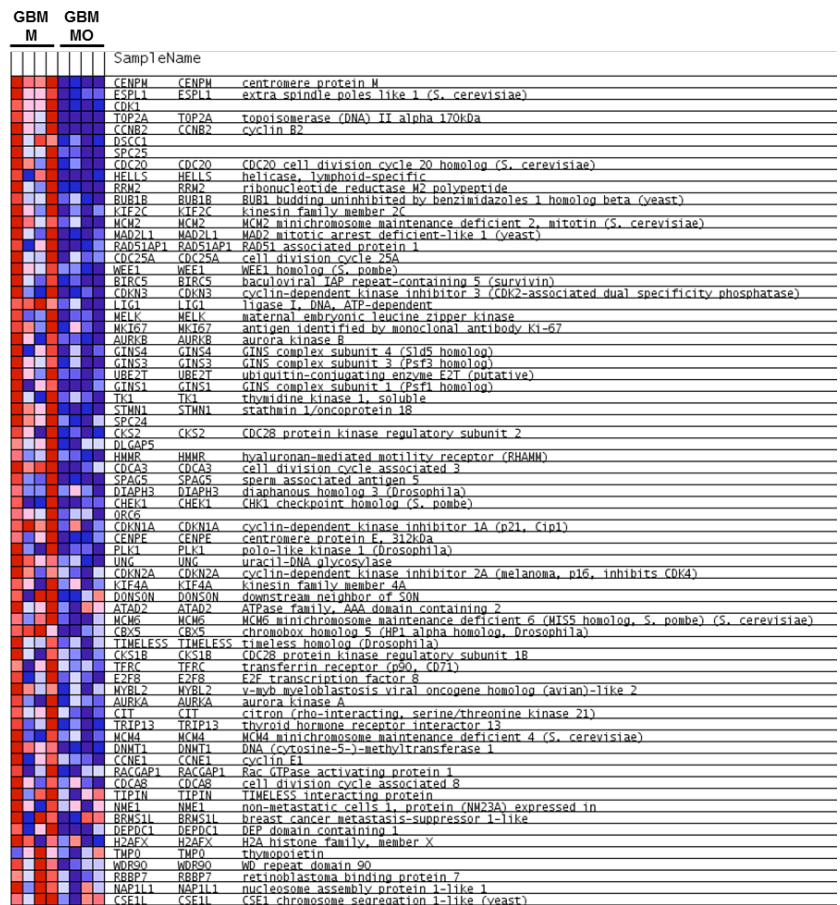

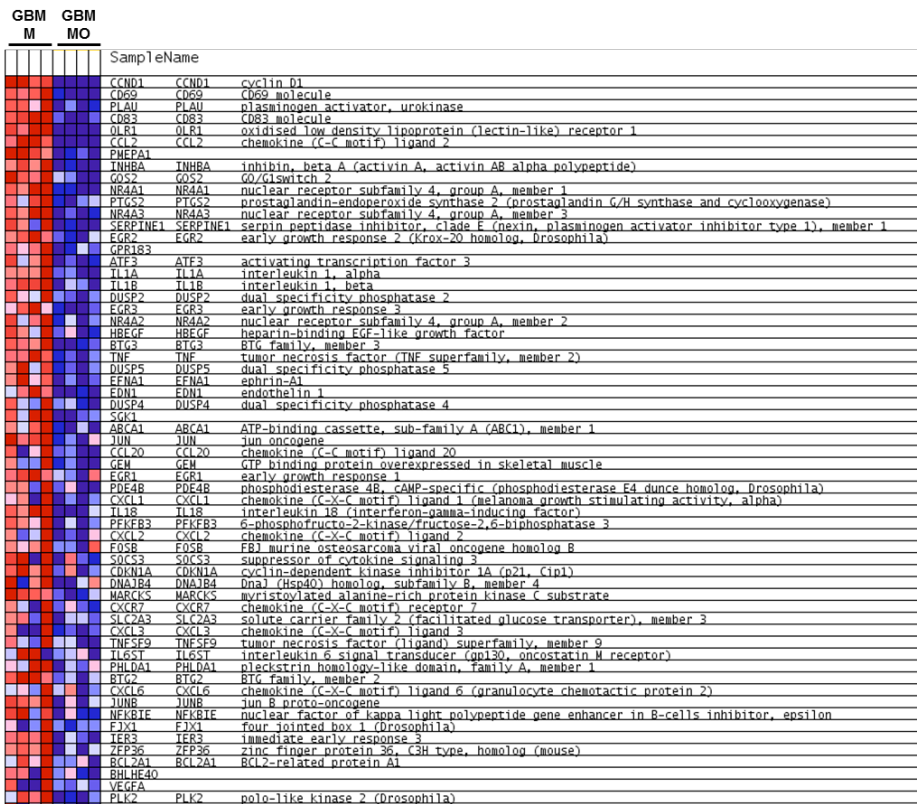

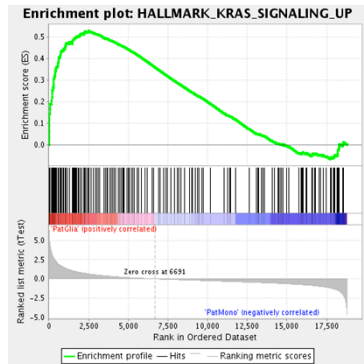

| GBM<br>M | GBM<br>MO | SampleName |                                                                                               |
|----------|-----------|------------|-----------------------------------------------------------------------------------------------|
|          |           | SPPI       | secreted phosphoprotein 1 (osteopontin, bone sialoprotein I, early T-lymphocyte activation 1) |
|          |           | RG516      | regulator of G-protein signalling 16                                                          |
|          |           | PLAU       | plasminogen activator, urokinase                                                              |
|          |           | SPRY2      | serouty homolog 2 (Drosophila)                                                                |
|          |           | NRP1       | neuropilin 1                                                                                  |
|          |           | GFNHR      | glycoprotein (transmembrane) nhb                                                              |
|          |           | TNHR8      | inhibin, beta A (activin A, activin AR alpha polypeptide)                                     |
|          |           | GOS2       | G0/G1switch 2                                                                                 |
|          |           | SCN1B      | sodium channel, voltage-gated, type I, beta                                                   |
|          |           | PTGS2      | prostaglandin-endoperoxide synthase 2 (prostaglandin G/H synthase and cyclooxygenase)         |
|          |           | ETS5       | ets variant gene 5 (ets-related molecule)                                                     |
|          |           | SPARC1     | SPARC-like 1 (masto, hevyn)                                                                   |
|          |           | ENG        | endoglin (Osler-Rendu-Weber syndrome 1)                                                       |
|          |           | IL18       | interleukin 1, beta                                                                           |
|          |           | MMD        | monocyte to macrophage differentiation-associated                                             |
|          |           | IGFBP3     | insulin-like growth factor binding protein 3                                                  |
|          |           | HBE6       | heparin-binding EGF-like growth factor                                                        |
|          |           | DCBLD2     | discoidin, CUB and ICD domain containing 2                                                    |
|          |           | ST6GAL1    | ST6 beta-galactosamide alpha-2,6-sialyltransferase 1                                          |
|          |           | ANKH       | anklyosis, progressive homolog (mouse)                                                        |
|          |           | PRDM1      | PR domain containing 1, with ZNF domain                                                       |
|          |           | CFB        | complement factor B                                                                           |
|          |           | SERPINA3   | serpin peptidase inhibitor, clade A (alpha-1 antiproteinase, antitrypsin), member 3           |
|          |           | TFPI       | tissue factor pathway inhibitor (lipoprotein-associated coagulation inhibitor)                |
|          |           | ALDH1A2    | aldehyde dehydrogenase 1 family, member A2                                                    |
|          |           | CCL20      | chemokine (C-C motif) ligand 20                                                               |
|          |           | TSPAN13    | tetraspanin 13                                                                                |
|          |           | GADD45G    | growth arrest and DNA-damage-inducible, gamma                                                 |
|          |           | PLVAP      | plasmalemma vesicle associated protein                                                        |
|          |           | ANGPTL4    | angiotensin-like 4                                                                            |
|          |           | TSPAN7     | tetraspanin 7                                                                                 |
|          |           | SODCAG8    | serologically defined colon cancer antigen 8                                                  |
|          |           | AKAP12     | A kinase (PKA) anchor protein (gravin) 12                                                     |
|          |           | PLEK2      | pleckstrin 2                                                                                  |
|          |           | WMP11      | matrix metalloproteinase 11 (stromelysin 3)                                                   |
|          |           | SLPI       | secretory leukocyte peptidase inhibitor                                                       |
|          |           | HSD11B1    | hydroxysteroid (11-beta) dehydrogenase 1                                                      |
|          |           | ARG1       | arginase, liver                                                                               |
|          |           | CBOT       | carnitine 0-octanoyltransferase                                                               |
|          |           | ANO1       |                                                                                               |
|          |           | CFH        | complement factor H                                                                           |
|          |           | CCND2      | cyclin D2                                                                                     |
|          |           | KIF5C      | kinesin family member 5C                                                                      |
|          |           | PIGB       | polymeric immunoglobulin receptor                                                             |
|          |           | ETS1       | v-ets erythroblastosis virus E26 oncogene homolog 1 (avian)                                   |
|          |           | CPE        | carboxypeptidase E                                                                            |
|          |           | USH1C      | usher syndrome 1C (autosomal recessive, severe)                                               |
|          |           | PLAT       | plasminogen activator, tissue                                                                 |
|          |           | AP00       | apolipoprotein D                                                                              |
|          |           | SPON1      | spondin 1, extracellular matrix protein                                                       |
|          |           | THEM158    | transmembrane protein 158                                                                     |
|          |           | CMUR1      | chemokine-like receptor 1                                                                     |
|          |           | GNCYA3     | guanylate cyclase 1, soluble, alpha 3                                                         |
|          |           | SNAP25     | synaptosomal-associated protein, 25kDa                                                        |
|          |           | IL7R       | interleukin 7 receptor                                                                        |
|          |           | CYPK       | glycophorin C (kerbich blood group)                                                           |
|          |           | PRKG2      | protein kinase, cAMP-dependent, type II                                                       |
|          |           | GNGL1      | guanine nucleotide binding protein (G protein), gamma 11                                      |
|          |           | EPHB2      | EPH receptor B2                                                                               |
|          |           | PRCDLG2    | programmed cell death 1 ligand 2                                                              |
|          |           | TRIB1      | tribbles homolog 1 (Drosophila)                                                               |
|          |           | THEM176B   | transmembrane protein 176B                                                                    |
|          |           | ADAMDEC1   | ADAM-like, decysin 1                                                                          |

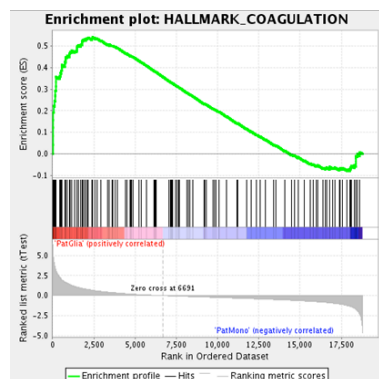

| GBM<br>M | GBM<br>MO | SampleName                                                                                                      |
|----------|-----------|-----------------------------------------------------------------------------------------------------------------|
|          |           | AP0C1 AP0C1 apolipoprotein C-I                                                                                  |
|          |           | C3 C3 complement component 3                                                                                    |
|          |           | A2M A2M alpha-2-macroglobulin                                                                                   |
|          |           | PLAU PLAU plasminogen activator, urokinase                                                                      |
|          |           | OLR1 OLR1 oxidised low density lipoprotein (lectin-like) receptor 1                                             |
|          |           | LGMN LGMN legumain                                                                                              |
|          |           | PROS1 PROS1 protein S (alpha)                                                                                   |
|          |           | TIMP3 TIMP3 TIMP metalloproteinase inhibitor 3 (Sorsby fundus dystrophy, pseudoinflammatory)                    |
|          |           | C10A C10A complement component 1, q subcomponent, A chain                                                       |
|          |           | SERPINE1 SERPINE1 serpin peptidase inhibitor, clade F (nexin, plasminogen activator inhibitor type 1), member 1 |
|          |           | AP0C2 AP0C2 apolipoprotein C-II                                                                                 |
|          |           | HTRA1 HTRA1 HTRA serine peptidase 1                                                                             |
|          |           | PDGFR PDGFR platelet-derived growth factor beta polypeptide (simian sarcoma viral (v-sis) oncogene homolog)     |
|          |           | MEP1A MEP1A meprin A, alpha (PABA peptide hydrolase)                                                            |
|          |           | TF TF transferrin                                                                                               |
|          |           | MMP14 MMP14 matrix metalloproteinase 14 (membrane-inserted)                                                     |
|          |           | CFB CFB complement factor B                                                                                     |
|          |           | SERPINE1 SERPINE1 serpin peptidase inhibitor, clade G (C1 inhibitor), member 1, (angioedema, hereditary)        |
|          |           | MMP7 MMP7 matrix metalloproteinase 7 (matrilysin, uterine)                                                      |
|          |           | KLKB1 KLKB1 kallikrein B, plasma (Fletcher factor) 1                                                            |
|          |           | CFI CFI complement factor I                                                                                     |
|          |           | PROC PROC protein C (inactivator of coagulation factors Va and VIIIa)                                           |
|          |           | C2 C2 complement component 2                                                                                    |
|          |           | C1R C1R complement component 1, r subcomponent                                                                  |
|          |           | MMP11 MMP11 matrix metalloproteinase 11 (stromelysin 3)                                                         |
|          |           | CD9 CD9 CD9 molecule                                                                                            |
|          |           | S100A13 S100A13 S100 calcium binding protein A13                                                                |
|          |           | AP0A1 AP0A1 apolipoprotein A-I                                                                                  |
|          |           | MMP8 MMP8 matrix metalloproteinase 8 (neutrophil collagenase)                                                   |
|          |           | DPP4 DPP4 dipeptidyl-peptidase 4 (CD26, adenosine deaminase complexing protein 2)                               |
|          |           | CFH CFH complement factor H                                                                                     |
|          |           | USP11 USP11 ubiquitin specific peptidase 11                                                                     |
|          |           | DUSP14 DUSP14 dual specificity phosphatase 14                                                                   |
|          |           | FBN1 FBN1 fibrillin 1                                                                                           |
|          |           | MMP1 MMP1 matrix metalloproteinase 1 (interstitial collagenase)                                                 |
|          |           | VWF VWF von Willebrand factor                                                                                   |
|          |           | RGN RGN regucalcin (senescence marker protein-30)                                                               |
|          |           | PLAT PLAT plasminogen activator, tissue                                                                         |
|          |           | ADAM9 ADAM9 ADAM metalloproteinase domain 9 (matrin gamma)                                                      |
|          |           | RAPGEF3 RAPGEF3 Ras guanine nucleotide exchange factor (GEF) 3                                                  |
|          |           | GSN GSN gelsolin (amyloidosis, Finnish type)                                                                    |
|          |           | ITGB3 ITGB3 integrin, beta 3 (platelet glycoprotein IIIa, antigen CD61)                                         |
|          |           | FN1 FN1 fibronectin 1                                                                                           |
|          |           | PRSS23 PRSS23 protease, serine, 23                                                                              |
|          |           | MAFF MAFF v-maf musculoaponeurotic fibrosarcoma oncogene homolog F (avian)                                      |
|          |           | THBD THBD thrombomodulin                                                                                        |

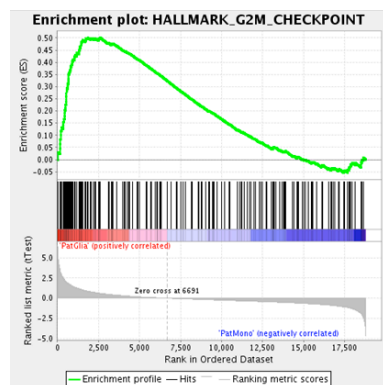

| GBM<br>M | GBM<br>MO | SampleName                                                                                          |
|----------|-----------|-----------------------------------------------------------------------------------------------------|
|          |           | CCND1 CCND1 cyclin D1                                                                               |
|          |           | ESPL1 ESPL1 extra spindle poles like 1 (S. cerevisiae)                                              |
|          |           | SLC7A5 SLC7A5 solute carrier family 7 (cationic amino acid transporter, y+ system), member 5        |
|          |           | CDK1 CDK1                                                                                           |
|          |           | TOP2A TOP2A topoisomerase (DNA) II alpha 170kDa                                                     |
|          |           | TPX2 TPX2 TPX2, microtubule-associated, homolog (Xenopus laevis)                                    |
|          |           | CCNB2 CCNB2 cyclin B2                                                                               |
|          |           | KIF20B KIF20B                                                                                       |
|          |           | CDK20 CDK20 CDK20 cell division cycle 20 homolog (S. cerevisiae)                                    |
|          |           | KIF2C KIF2C kinesin family member 2C                                                                |
|          |           | PRC1 PRC1 protein regulator of cytokinesis 1                                                        |
|          |           | WDCB0 WDCB0                                                                                         |
|          |           | MCH2 MCH2 MCH2 minichromosome maintenance deficient 2, mitotin (S. cerevisiae)                      |
|          |           | MAD2L1 MAD2L1 MAD2 mitotic arrest deficient-like 1 (yeast)                                          |
|          |           | UBE2C UBE2C ubiquitin-conjugating enzyme E2C                                                        |
|          |           | CENPA CENPA centromere protein A                                                                    |
|          |           | TTK TTK TTK protein kinase                                                                          |
|          |           | CDK25A CDK25A cell division cycle 25A                                                               |
|          |           | TRRAP TRRAP tropomyosin associated protein (tastin)                                                 |
|          |           | CTNS2 CTNS2 CTNS complex subunit 2 (Psf2 homolog)                                                   |
|          |           | BTRC5 BTRC5 baculoviral IAP repeat-containing 5 (survivin)                                          |
|          |           | CDKN3 CDKN3 cyclin-dependent kinase inhibitor 3 (CDK2-associated dual specificity phosphatase)      |
|          |           | MK167 MK167 antigen identified by monoclonal antibody K1-67                                         |
|          |           | CCNB2 CCNB2 cyclin B2                                                                               |
|          |           | BUB1 BUB1 BUB1 budding uninhibited by benzimidazoles 1 homolog (yeast)                              |
|          |           | CDK6 CDK6 CDK6 cell division cycle 6 homolog (S. cerevisiae)                                        |
|          |           | AURKB AURKB aurora kinase B                                                                         |
|          |           | KIF11 KIF11 kinesin family member 11                                                                |
|          |           | PRK PRK PDZ binding kinase                                                                          |
|          |           | NEK2 NEK2 NIMA (never in mitosis gene a)-related kinase 2                                           |
|          |           | STMN1 STMN1 stathmin 1/oncoprotein 18                                                               |
|          |           | KIF15 KIF15 kinesin family member 15                                                                |
|          |           | CKS2 CKS2 CDK28 protein kinase regulatory subunit 2                                                 |
|          |           | PTTG3P PTTG3P                                                                                       |
|          |           | HMMR HMMR hyaluronan-mediated motility receptor (RHAMM)                                             |
|          |           | CHEK1 CHEK1 CHEK1 checkpoint homolog (S. pombe)                                                     |
|          |           | ORC6 ORC6                                                                                           |
|          |           | CENPE CENPE centromere protein E, 312kDa                                                            |
|          |           | PLK1 PLK1 polo-like kinase 1 (Drosophila)                                                           |
|          |           | SMC2 SMC2 structural maintenance of chromosomes 2                                                   |
|          |           | WARRCS WARRCS wavy-striated alanine-rich protein kinase C substrate                                 |
|          |           | TNP02 TNP02 transportin 2 (importin 3, karyopherin beta 2b)                                         |
|          |           | HIF1A HIF1A hypoxia-inducible factor 1, alpha subunit (basic helix-loop-helix transcription factor) |
|          |           | EXO1 EXO1 exonuclease 1                                                                             |
|          |           | KIF4A KIF4A kinesin family member 4A                                                                |
|          |           | CCNT1 CCNT1 cyclin T1                                                                               |
|          |           | WRN WRN Werner syndrome                                                                             |
|          |           | MCM6 MCM6 MCM6 minichromosome maintenance deficient 6 (MIS5 homolog, S. pombe) (S. cerevisiae)      |
|          |           | ATF5 ATF5 activating transcription factor 5                                                         |
|          |           | CENPE CENPE centromere protein E, 350/400kDa (mitotin)                                              |
|          |           | CKS1B CKS1B CDK28 protein kinase regulatory subunit 1B                                              |
|          |           | NUSAP1 NUSAP1 nucleolar and spindle associated protein 1                                            |
|          |           | MYBL2 MYBL2 v-myb myeloblastosis viral oncogene homolog (avian)-like 2                              |
|          |           | AURKA AURKA aurora kinase A                                                                         |
|          |           | KPNB1 KPNB1 karyopherin (importin) beta 1                                                           |
|          |           | SETD8 SETD8 SET domain containing (lysine methyltransferase) 8                                      |
|          |           | RACGAP1 RACGAP1 Rac GTPase activating protein 1                                                     |
|          |           | CC45 CC45                                                                                           |
|          |           | CASC5 CASC5 cancer susceptibility candidate 5                                                       |
|          |           | CASP8AP2 CASP8AP2 CASP8 associated protein 2                                                        |
|          |           | CNE CNE cyclin F                                                                                    |
|          |           | H2AFX H2AFX H2A histone family, member X                                                            |
|          |           | RAD54L RAD54L RAD54-like (S. cerevisiae)                                                            |
|          |           | TMP0 TMP0 thymopoietin                                                                              |
|          |           | STIL STIL SCL/TAL1 interrupting locus                                                               |
|          |           | DMD DMD dystrophin (muscular dystrophy, Duchenne and Becker types)                                  |

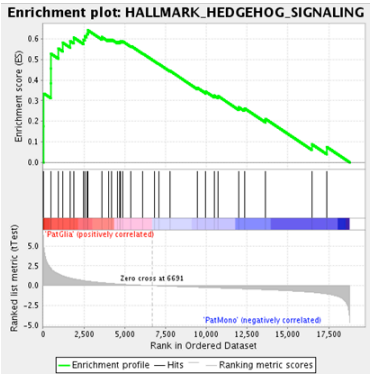

| GBM |  | GBM |  | SampleName                                                                                  |
|-----|--|-----|--|---------------------------------------------------------------------------------------------|
| M   |  | MO  |  |                                                                                             |
|     |  |     |  | GPR56 GPR56 G protein-coupled receptor 56                                                   |
|     |  |     |  | NRP1 NRP1 neuropilin 1                                                                      |
|     |  |     |  | NRP2 NRP2 neuropilin 2                                                                      |
|     |  |     |  | NRCAM NRCAM neuronal cell adhesion molecule                                                 |
|     |  |     |  | VLDLR VLDLR very low density lipoprotein receptor                                           |
|     |  |     |  | HEY1 HEY1 hairy/enhancer-of-split related with YRPW motif 1                                 |
|     |  |     |  | CDK6 CDK6 cyclin-dependent kinase 6                                                         |
|     |  |     |  | GLI1 GLI1 glioma-associated oncogene homolog 1 (zinc finger protein)                        |
|     |  |     |  | VEGFA                                                                                       |
|     |  |     |  | NF1 NF1 neurofibromin 1 (neurofibromatosis, von Recklinghausen disease, Watson disease)     |
|     |  |     |  | SHH SHH sonic hedgehog homolog (Drosophila)                                                 |
|     |  |     |  | CELSR1 CELSR1 cadherin, EGF LAG seven-pass G-type receptor 1 (flamingo homolog, Drosophila) |
|     |  |     |  | CRMP1 CRMP1 collapsin response mediator protein 1                                           |



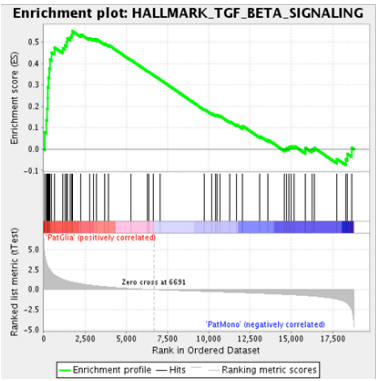

GBM  
M

GBM  
MO

| SampleName |          |                                                                                               |
|------------|----------|-----------------------------------------------------------------------------------------------|
| PHEPA1     |          |                                                                                               |
| SHAD6      | SHAD6    | SHAD, mothers against DPP homolog 6 (Drosophila)                                              |
| SERPINE1   | SERPINE1 | serpin peptidase inhibitor, clade E (nexin, plasminogen activator inhibitor type 1), member 1 |
| TJP1       | TJP1     | tight junction protein 1 (zona occludens 1)                                                   |
| BCAR3      | BCAR3    | breast cancer anti-estrogen resistance 3                                                      |
| ENG        | ENG      | endoglin (Osler-Rendu-Weber syndrome 1)                                                       |
| SKIL       | SKIL     | SKI-like                                                                                      |
| SHAD7      | SHAD7    | SHAD, mothers against DPP homolog 7 (Drosophila)                                              |
| IO3        | IO3      | inhibitor of DNA binding 3, dominant negative helix-loop-helix protein                        |
| LTBP2      | LTBP2    | latent transforming growth factor beta binding protein 2                                      |
| BMPR2      | BMPR2    | bone morphogenetic protein receptor, type II (serine/threonine kinase)                        |
| WMTR1      | WMTR1    | WW domain containing transcription regulator 1                                                |
| IO1        | IO1      | inhibitor of DNA binding 1, dominant negative helix-loop-helix protein                        |
| TGFBRI     | TGFBRI   | transforming growth factor, beta receptor 1 (activin A receptor type II-like kinase, 53kDa)   |
| CDKN1C     | CDKN1C   | cyclin-dependent kinase inhibitor 1C (p57, Kip2)                                              |
| SKI        | SKI      | v-ski sarcoma viral oncogene homolog (avian)                                                  |
| JUNB       | JUNB     | jun B proto-oncogene                                                                          |

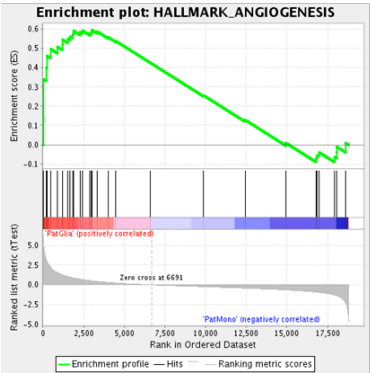

| GBM |  | GBM |  | SampleName |          |                                                                                                     |
|-----|--|-----|--|------------|----------|-----------------------------------------------------------------------------------------------------|
| M   |  | MO  |  |            |          |                                                                                                     |
|     |  |     |  | SPP1       | SPP1     | secreted phosphoprotein 1 (osteopontin, bone sialoprotein 1, early T-lymphocyte activation 1)       |
|     |  |     |  | OLR1       | OLR1     | oxidised low density lipoprotein (lectin-like) receptor 1                                           |
|     |  |     |  | NRP1       | NRP1     | neuropilin 1                                                                                        |
|     |  |     |  | TNFRSF21   | TNFRSF21 | tumor necrosis factor receptor superfamily, member 21                                               |
|     |  |     |  | JAG2       | JAG2     | jagged 2                                                                                            |
|     |  |     |  | ITGAV      | ITGAV    | integrin, alpha V (vitronectin receptor, alpha polypeptide, antigen CD51)                           |
|     |  |     |  | PSIL1      | PSIL1    | folistatin-like 1                                                                                   |
|     |  |     |  | COL3A1     | COL3A1   | collagen, type III, alpha 1 (Ehlers-Danlos syndrome type IV, autosomal dominant)                    |
|     |  |     |  | FGFR1      | FGFR1    | fibroblast growth factor receptor 1 (fms-related tyrosine kinase 2, Pfeiffer syndrome)              |
|     |  |     |  | CCND2      | CCND2    | cyclin D2                                                                                           |
|     |  |     |  | CXCL6      | CXCL6    | chemokine (C-X-C motif) ligand 6 (granulocyte chemotactic protein 2)                                |
|     |  |     |  | PTK2       | PTK2     | PTK2 protein tyrosine kinase 2                                                                      |
|     |  |     |  | VEGFA      | VEGFA    | platelet-derived growth factor alpha polypeptide                                                    |
|     |  |     |  | PDGFA      | PDGFA    | platelet-derived growth factor alpha polypeptide                                                    |
|     |  |     |  | THBD       | THBD     | thrombomodulin                                                                                      |
|     |  |     |  | LPL        | LPL      | lipoprotein lipase                                                                                  |
|     |  |     |  | KCNJ8      | KCNJ8    | potassium inwardly-rectifying channel, subfamily J, member 8                                        |
|     |  |     |  | PRG2       | PRG2     | proteoglycan 2, bone marrow (natural killer cell activator, eosinophil granule major basic protein) |

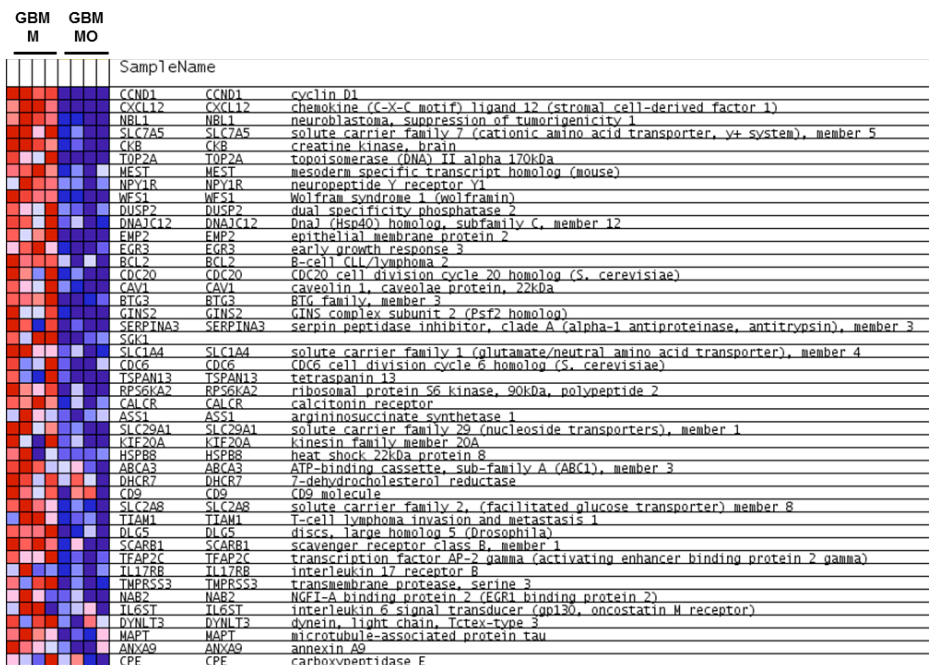

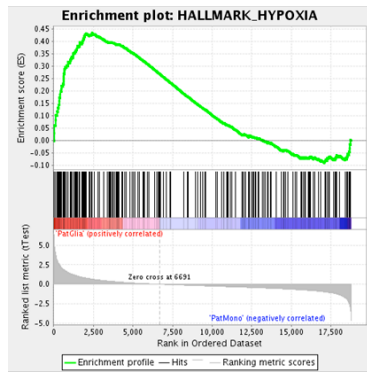

| GBM<br>M | GBM<br>MO | SampleName                                                                                                    |
|----------|-----------|---------------------------------------------------------------------------------------------------------------|
|          |           | HS3ST1 HS3ST1 heparan sulfate (glucosamine) 3-O-sulfotransferase 1                                            |
|          |           | SLC2A5 SLC2A5 solute carrier family 2 (facilitated glucose/fructose transporter), member 5                    |
|          |           | CTGF CTGF connective tissue growth factor                                                                     |
|          |           | PPP1R3C PPP1R3C protein phosphatase 1, regulatory (inhibitor) subunit 3C                                      |
|          |           | SEPPIN1 SEPPIN1 serpin peptidase inhibitor, clade F (nexin, plasminogen activator inhibitor type 1), member 1 |
|          |           | ATF3 ATF3 activating transcription factor 3                                                                   |
|          |           | IGFBP3 IGFBP3 insulin-like growth factor binding protein 3                                                    |
|          |           | C58P2 C58P2 cysteine and glycine-rich protein 2                                                               |
|          |           | BCL2 BCL2 B-cell CLL/lymphoma 2                                                                               |
|          |           | CAV1 CAV1 caveolin 1, caveolae protein, 22kDa                                                                 |
|          |           | PDGFR PDGFR platelet-derived growth factor beta polypeptide (simian sarcoma viral (v-sis) oncogene homolog)   |
|          |           | EFNA1 EFNA1 ephrin-A1                                                                                         |
|          |           | VLDR VLDR very low density lipoprotein receptor                                                               |
|          |           | HAS1 HAS1 hyaluronan synthase 1                                                                               |
|          |           | ERBBF1 ERBBF1 ERBB receptor feedback inhibitor 1                                                              |
|          |           | NEDD4L NEDD4L neural precursor cell expressed, developmentally down-regulated 4-like                          |
|          |           | LUN LUN lun oncogene                                                                                          |
|          |           | DCN DCN decorin                                                                                               |
|          |           | SLC37A4 SLC37A4 solute carrier family 37 (glycerol-6-phosphate transporter), member 4                         |
|          |           | GPC1 GPC1 glypican 1                                                                                          |
|          |           | DTNA DTNA dystrobrevin, alpha                                                                                 |
|          |           | GAPDH5 GAPDH5 glyceraldehyde-3-phosphate dehydrogenase, spermatogenic                                         |
|          |           | ANGPTL4 ANGPTL4 angiopoietin-like 4                                                                           |
|          |           | PFKFB3 PFKFB3 6-phosphofructo-2-kinase/fructose-2,6-bisphosphatase 3                                          |
|          |           | AKAP12 AKAP12 A kinase (PRKA) anchor protein (gravin) 12                                                      |
|          |           | CKN1A CKN1A cyclin-dependent kinase inhibitor 1A (p21, Cip1)                                                  |
|          |           | VDLR3 VDLR3 VDEL (Lys-Asp-Glu-Leu) endoplasmic reticulum protein retention receptor 3                         |
|          |           | ATP7A ATP7A ATPase, Cu++ transporting, alpha polypeptide (Menkes syndrome)                                    |
|          |           | MTIE MTIE metallothionein 1E (functional)                                                                     |
|          |           | SDC3 SDC3 syndecan 3 (N-syndecan)                                                                             |
|          |           | ROSA ROSA ROSA-related orphan receptor A                                                                      |
|          |           | CXCR7 CXCR7 chemokine (C-X-C motif) receptor 7                                                                |
|          |           | SLC2A3 SLC2A3 solute carrier family 2 (facilitated glucose transporter), member 3                             |
|          |           | SCARB1 SCARB1 scavenger receptor class B, member 1                                                            |
|          |           | PHKG1 PHKG1 phosphorylase kinase, gamma 1 (muscle)                                                            |
|          |           | ENO3 ENO3 enolase 3 (beta, muscle)                                                                            |
|          |           | PRKCA PRKCA protein kinase C, alpha                                                                           |
|          |           | SDC2 SDC2 syndecan 2 (heparan sulfate proteoglycan 1, cell surface-associated, fibroglycan)                   |
|          |           | TPD52 TPD52 tumor protein 52                                                                                  |
|          |           | CKN1C CKN1C cyclin-dependent kinase inhibitor 1C (p57, Kip2)                                                  |
|          |           | ETS1 ETS1 v-ets erythroblastosis virus E26 oncogene homolog 1 (avian)                                         |
|          |           | TER3 TER3 immediate early response 3                                                                          |
|          |           | ZFP36 ZFP36 zinc finger protein 36, C3H type, homolog (mouse)                                                 |
|          |           | GPC4 GPC4 glypican 4                                                                                          |
|          |           | DHLHE40 DHLHE40                                                                                               |
|          |           | VEGFA VEGFA                                                                                                   |
|          |           | PTRF PTRF polymerase I and transcript release factor                                                          |
|          |           | LARGE LARGE like-glycosyltransferase                                                                          |
|          |           | DDIT4 DDIT4 DNA-damage-inducible transcript 4                                                                 |
|          |           | SELENBP1 SELENBP1 selenium binding protein 1                                                                  |
|          |           | ADW ADW adrenomedullin                                                                                        |
|          |           | ILVBL ILVBL ilvB (bacterial acetolactate synthase)-like                                                       |
|          |           | HK2 HK2 hexokinase 2                                                                                          |
|          |           | EGFR EGFR epidermal growth factor receptor (erythroblastic leukemia viral (v-erb-b) oncogene homolog, avian)  |
|          |           | SLC2A1 SLC2A1 solute carrier family 2 (facilitated glucose transporter), member 1                             |
|          |           | PKLR PKLR pyruvate kinase, liver and RBC                                                                      |
|          |           | MAFF MAFF v-maf musculoaponeurotic fibrosarcoma oncogene homolog F (avian)                                    |

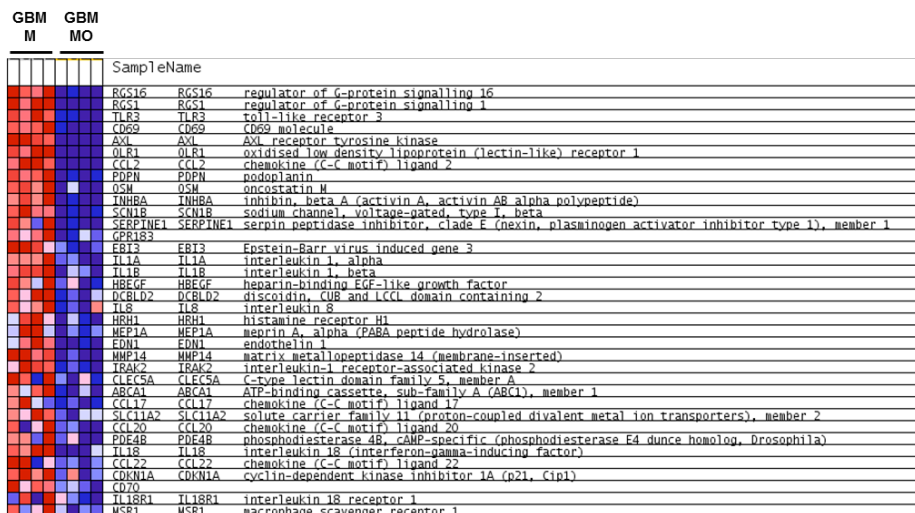

Supplemental Figure 8

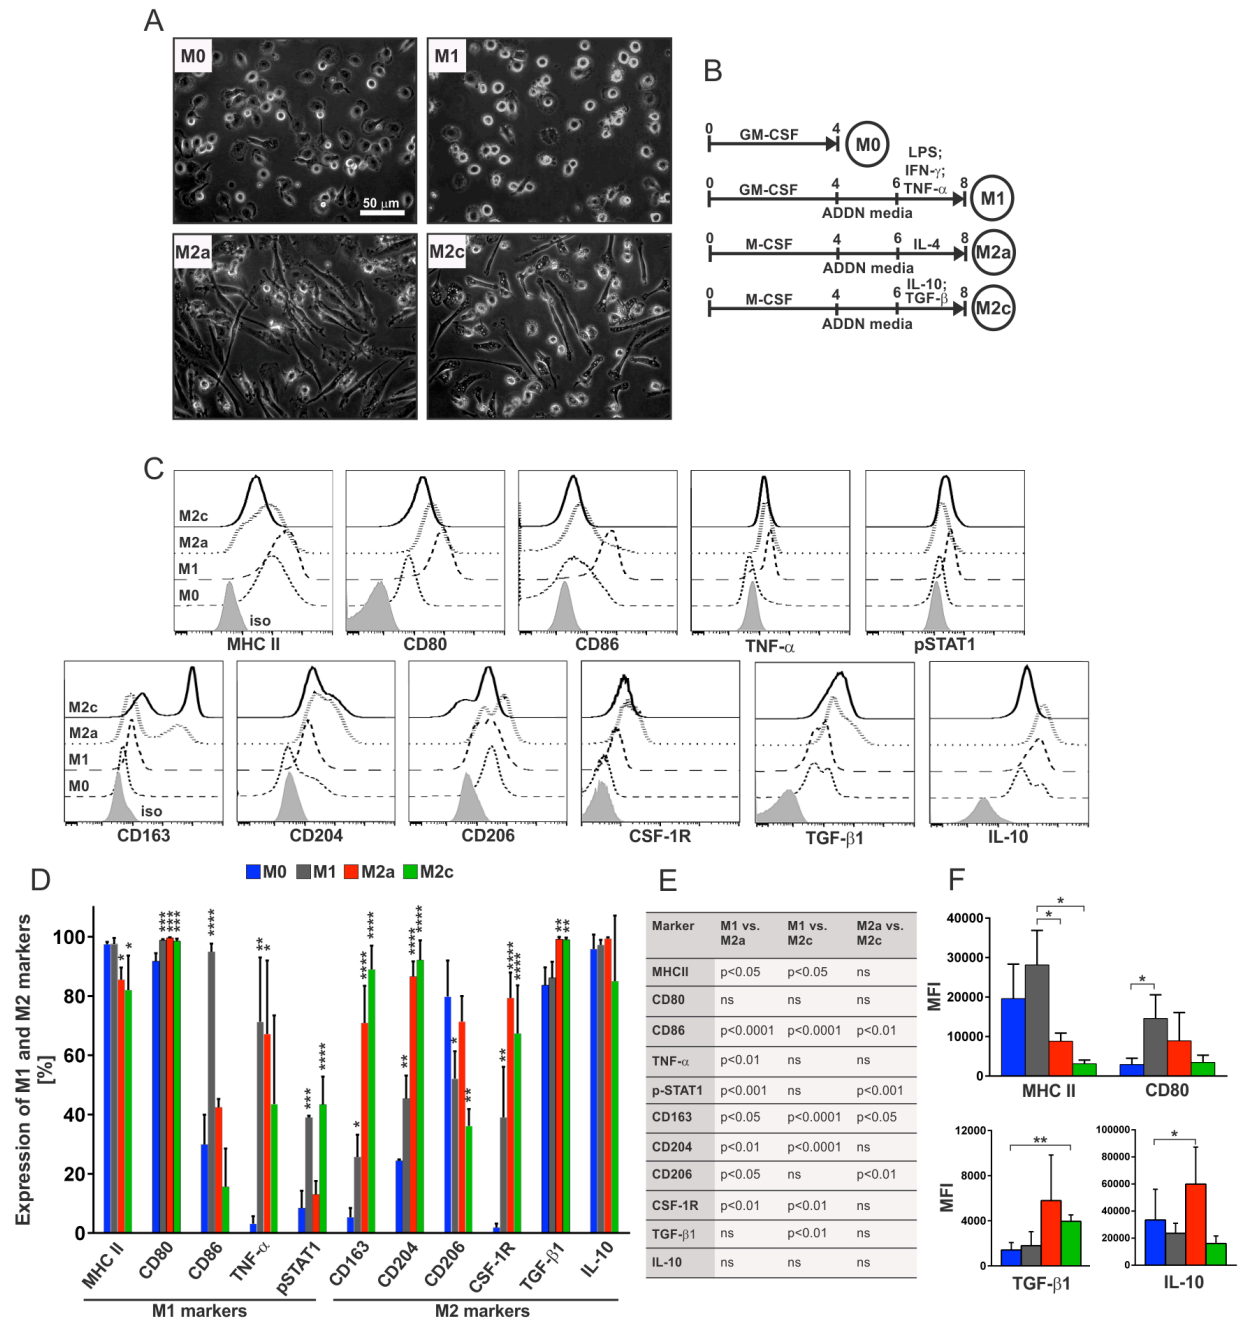

**Supplemental Figure 8.** In vitro model of monocyte-to-macrophage differentiation and polarization toward the M1, M2a, and M2c phenotypes. **(A)** Morphology of non-polarized M0 and M1-, M2a-, and M2c-polarized macrophages. Scale = 50  $\mu$ m. **(B)** Scheme of macrophage polarization in vitro. **(C)** Representative histogram overlay for MHC class II, CD80, CD86, TNF- $\alpha$ , p-STAT1, CD163, CD204,

CD206, CSF-1R, TGF- $\beta$ 1, and IL-10 expression in M0, M1, M2a, and M2c macrophages relative to isotype control (gray histogram). **(D)** Expression of M1 and M2 markers in M0, M1, M2a, and M2c macrophages is shown. The data were derived from three independent experiments and are presented as the mean  $\pm$  SD. A linear mixed-effects model was used to calculate *P* values (M1, M2a, and M2c vs. M0). \**P* < 0.05; \*\**P* < 0.01; \*\*\**P* < 0.001; \*\*\*\**P* < 0.0001. **(E)** Results of statistical analysis of each marker. ns, not significant. A random effects model was used to calculate *P* values. **(F)** MFI of MHC class II, CD80, TGF- $\beta$ 1, and IL-10 expression is shown. The data are presented as the mean  $\pm$  SD. A two-sided paired *t*-test was used to calculate *P* values. \**P* < 0.05; \*\**P* < 0.01.
